# Supplementary material for: Metabolic Syndrome and Acute Respiratory Distress Syndrome in Hospitalized Patients With COVID-19
Source: PubMed Central journal article supplement (PMC8696573; doi:10.1001/jamanetworkopen.2021.40568), 2021-12-22
Supplement: jamanetwopen-e2140568-s001.pdf [file jamanetwopen-e2140568-s001.pdf]

## Supplemental Online Content

Denson JL, Gillet AS, Zu Y, et al; Society of Critical Care Medicine Discovery Viral Infection and Respiratory Illness Universal Study (VIRUS): COVID-19 Registry Investigator Group. Metabolic syndrome and acute respiratory distress syndrome in hospitalized patients with COVID-19. *JAMA Netw Open*. 2021;4(12):e2140568. doi:10.1001/jamanetworkopen.2021.40568

**eFigure 1.** Associations of Individual Metabolic Syndrome Comorbidities With Outcomes

**eFigure 2.** Association of Hospital Case Volume With Mortality

This supplemental material has been provided by the authors to give readers additional information about their work.

**eFigure 1.** Associations of Individual Metabolic Syndrome Comorbidities With Outcomes

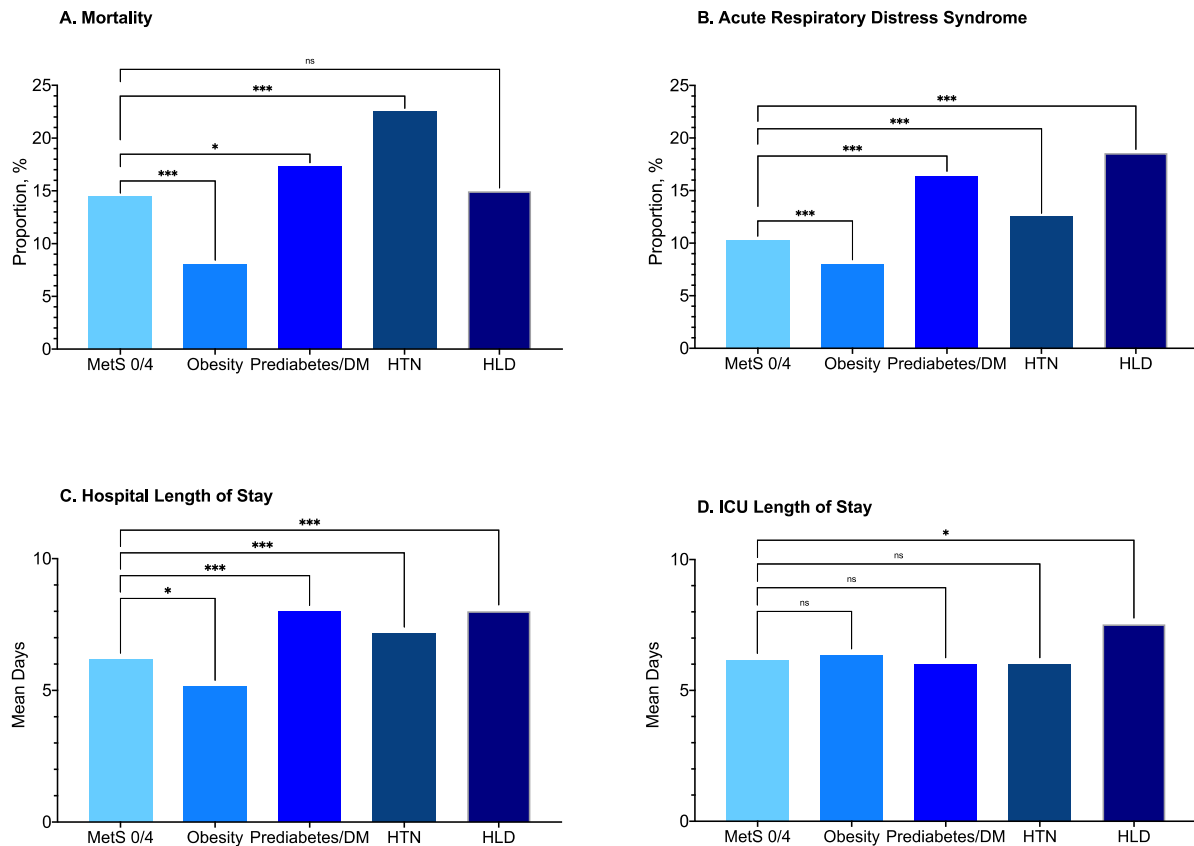

**eFigure 1:** Panels A and B: Bar graphs of proportion of hospital mortality and Acute Respiratory Distress Syndrome among MetS 0/4, obesity, prediabetes/DM, HTN and dyslipidemia. Panels C and D: Bar graphs of mean hospital and ICU length of stay in days for patients with obesity, prediabetes/DM, HTN and dyslipidemia compared to MetS 0/4. Each bar represents patients who were eligible for that individual MetS criteria without any other simultaneous MetS conditions present. MetS=Metabolic syndrome. DM=Diabetes mellitus. HTN=Hypertension. ICU=Intensive Care Unit. MetS 0/4 n=5,148, obesity n=5,744, prediabetes/DM n=1,005, HTN n=4,097, and dyslipidemia=194. \*p<0.05. \*\*p<0.01. \*\*\*p<0.001.

**eFigure 2.** Association of Hospital Case Volume With Mortality

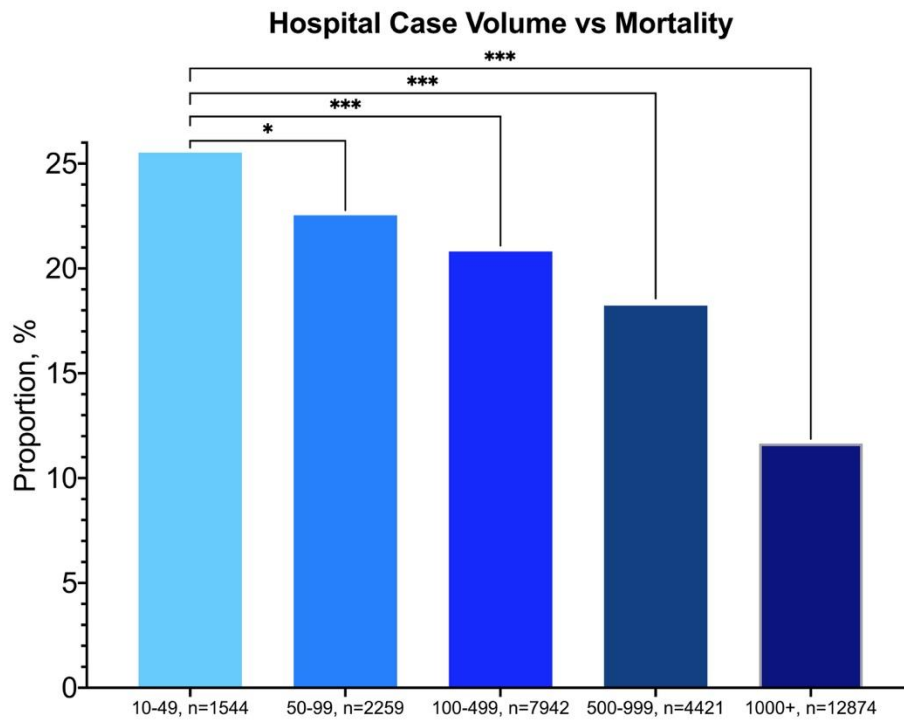

**eFigure 2:** Bar graph of hospital case volume vs mortality in proportions. \* $p < 0.05$ . \*\*\* $p < 0.001$ .
