# Supplementary material for: Metabolic Syndrome and Acute Respiratory Distress Syndrome in Hospitalized Patients With COVID-19
Source: PubMed Central journal article supplement (PMC8696573; doi:10.1001/jamanetworkopen.2021.40568), 2021-12-22
Supplement: jamanetwopen-e2140568-s002.pdf [file jamanetwopen-e2140568-s002.pdf]

\*Indicates required information. Only first name, last name, and suffix will appear in PubMed.

| <b>*Group Name(s): Society of Critical Care Medicine Discovery Viral Infection and Respiratory Illness Universal Study (VIRUS): COVID-19 Registry</b> |                    |                              |                  |                                     |                                          |                                                         |                                                                                            |
|-------------------------------------------------------------------------------------------------------------------------------------------------------|--------------------|------------------------------|------------------|-------------------------------------|------------------------------------------|---------------------------------------------------------|--------------------------------------------------------------------------------------------|
| <b>*First Name and Middle Initial(s)</b>                                                                                                              | <b>*Last Name</b>  | <b>*Suffix (eg, Jr, III)</b> | Academic Degrees | Institution                         | Location (city, state/province, country) | Role or Contribution, eg, chair, principal investigator | Group (if more than 1 Group listed in the byline) and/or Subgroup (eg, Steering Committee) |
| Jean-Baptiste                                                                                                                                         | Mesland            |                              |                  | Centre Hospitalier Jolimont         | Belgium                                  |                                                         |                                                                                            |
| Pierre                                                                                                                                                | Henin              |                              |                  | Centre Hospitalier Jolimont         | Belgium                                  |                                                         |                                                                                            |
| Hélène                                                                                                                                                | Petre              |                              |                  | Centre Hospitalier Jolimont         | Belgium                                  |                                                         |                                                                                            |
| Isabelle                                                                                                                                              | Buelens            |                              |                  | Centre Hospitalier Jolimont         | Belgium                                  |                                                         |                                                                                            |
| Anne-Catherine                                                                                                                                        | Gerard             |                              |                  | Centre Hospitalier Jolimont         | Belgium                                  |                                                         |                                                                                            |
| Philippe                                                                                                                                              | Clevenbergh        |                              |                  | The Brugmann University Hospital    | Belgium                                  |                                                         |                                                                                            |
| Rolando Claure                                                                                                                                        | Del Granado        |                              |                  | Clinica Los Olivos                  | Bolvia                                   |                                                         |                                                                                            |
| Jose A                                                                                                                                                | Mercado            |                              |                  | Clinica Los Olivos                  | Bolvia                                   |                                                         |                                                                                            |
| Esdenka                                                                                                                                               | Vega-Terraza       |                              |                  | Clinica Los Olivos                  | Bolvia                                   |                                                         |                                                                                            |
| Maria F                                                                                                                                               | Iturricha-Caceres  |                              |                  | Clinica Los Olivos                  | Bolvia                                   |                                                         |                                                                                            |
| Ruben                                                                                                                                                 | Garza              |                              |                  | Mackenzie Health                    | Canada                                   |                                                         |                                                                                            |
| Eric                                                                                                                                                  | Chu                |                              |                  | Mackenzie Health                    | Canada                                   |                                                         |                                                                                            |
| Victoria                                                                                                                                              | Chan               |                              |                  | Mackenzie Health                    | Canada                                   |                                                         |                                                                                            |
| Oscar Y                                                                                                                                               | Gavidia            |                              |                  | Clinica Medical SAS                 | Columbia                                 |                                                         |                                                                                            |
| Felipe                                                                                                                                                | Pachon             |                              |                  | Clinica Medical SAS                 | Columbia                                 |                                                         |                                                                                            |
| Mohamed El                                                                                                                                            | Kassas             |                              |                  | Helwan University                   | Egypt                                    |                                                         |                                                                                            |
| Ahmed                                                                                                                                                 | Tawheed            |                              |                  | Helwan University                   | Egypt                                    |                                                         |                                                                                            |
| Estela                                                                                                                                                | Pineda             |                              |                  | CEMESA Hospital                     | Honduras                                 |                                                         |                                                                                            |
| Gabina María                                                                                                                                          | Reyes Guillen      |                              |                  | Honduras Medical Center             | Honduras                                 |                                                         |                                                                                            |
| Helin Archaga                                                                                                                                         | Soto               |                              |                  | Honduras Medical Center             | Honduras                                 |                                                         |                                                                                            |
| Ana Karen                                                                                                                                             | Vallecillo Lizardo |                              |                  | Honduras Medical Center             | Honduras                                 |                                                         |                                                                                            |
| Smitha S                                                                                                                                              | Segu               |                              |                  | Bangalore Medical College and Resea | India                                    |                                                         |                                                                                            |
| Tuhin                                                                                                                                                 | Chakraborty        |                              |                  | Bangalore Medical College and Resea | India                                    |                                                         |                                                                                            |
| Epcebha                                                                                                                                               | Joyce              |                              |                  | Bangalore Medical College and Resea | India                                    |                                                         |                                                                                            |
| Phani Sreeharsha                                                                                                                                      | Kasumalla          |                              |                  | Bangalore Medical College and Resea | India                                    |                                                         |                                                                                            |
| Girish                                                                                                                                                | Vadgaonkar         |                              |                  | BSES MG Hospital                    | India                                    |                                                         |                                                                                            |
| Rekha                                                                                                                                                 | Ediga              |                              |                  | BSES MG Hospital                    | India                                    |                                                         |                                                                                            |

Supplemental Online Content: Nonauthor Collaborators

\*Indicates required information. Only first name, last name, and suffix will appear in PubMed.

| *First Name and Middle Initial(s) | *Last Name   | *Suffix (eg, Jr, III) | Academic Degrees | Institution                           | Location (city, state/province, country) | Role or Contribution, eg, chair, principal investigator | Group (if more than 1 Group listed in the byline) and/or Subgroup (eg, Steering Committee) |
|-----------------------------------|--------------|-----------------------|------------------|---------------------------------------|------------------------------------------|---------------------------------------------------------|--------------------------------------------------------------------------------------------|
| Shilpa                            | Basety       |                       |                  | BSES MG Hospital                      | India                                    |                                                         |                                                                                            |
| Shwetha                           | Dammareddy   |                       |                  | BSES MG Hospital                      | India                                    |                                                         |                                                                                            |
| Phani Sreeharsha                  | Kasumalla    |                       |                  | BSES MG Hospital                      | India                                    |                                                         |                                                                                            |
| Umamaheswara                      | Raju         |                       |                  | Gandhi Medical College and Hospital,  | India                                    |                                                         |                                                                                            |
| Janaki                            | Manduva      |                       |                  | Gandhi Medical College and Hospital,  | India                                    |                                                         |                                                                                            |
| Naresh                            | Kolakani     |                       |                  | Gandhi Medical College and Hospital,  | India                                    |                                                         |                                                                                            |
| Shreeja                           | Sripathi     |                       |                  | Gandhi Medical College and Hospital,  | India                                    |                                                         |                                                                                            |
| Sheetal                           | Chaitanya    |                       |                  | Gandhi Medical College and Hospital,  | India                                    |                                                         |                                                                                            |
| Anusha                            | Cherian      |                       |                  | Jawaharlal Institute of Postgraduate  | India                                    |                                                         |                                                                                            |
| Sreejith                          | Parameswaran |                       |                  | Jawaharlal Institute of Postgraduate  | India                                    |                                                         |                                                                                            |
| Magesh                            | Parthiban    |                       |                  | Jawaharlal Institute of Postgraduate  | India                                    |                                                         |                                                                                            |
| Priya A                           | Menu         |                       |                  | Jawaharlal Institute of Postgraduate  | India                                    |                                                         |                                                                                            |
| Mardul Kumar                      | Daga         |                       |                  | Maulana Azad Medical College and L    | India                                    |                                                         |                                                                                            |
| Munisha                           | Agarwal      |                       |                  | Maulana Azad Medical College and L    | India                                    |                                                         |                                                                                            |
| Ishan                             | Rohtagi      |                       |                  | Maulana Azad Medical College and L    | India                                    |                                                         |                                                                                            |
| Sridhar                           | Papani       |                       |                  | Medicover Hospitals                   | India                                    |                                                         |                                                                                            |
| Mahesh                            | Kamuram      |                       |                  | Medicover Hospitals                   | India                                    |                                                         |                                                                                            |
| Kamlesh Kumar                     | Agrawal      |                       |                  | Om Superspeciality Hospital           | India                                    |                                                         |                                                                                            |
| Vijendra                          | Baghel       |                       |                  | Om Superspeciality Hospital           | India                                    |                                                         |                                                                                            |
| Kirti Kumar                       | Patel        |                       |                  | Om Superspeciality Hospital           | India                                    |                                                         |                                                                                            |
| Surapaneni Krishna                | Mohan        |                       |                  | Panimalar Medical College Hospital &  | India                                    |                                                         |                                                                                            |
| Ekambaram                         | Jyothisree   |                       |                  | Panimalar Medical College Hospital &  | India                                    |                                                         |                                                                                            |
| Nooshin                           | Dalili       |                       |                  | Labbafinejad Medical Center, Shahid   | Iran                                     |                                                         |                                                                                            |
| Mohsen                            | Nafa         |                       |                  | Labbafinejad Medical Center, Shahid   | Iran                                     |                                                         |                                                                                            |
| Wataru                            | Matsuda      |                       |                  | Center Hospital of the National Cente | Japan                                    |                                                         |                                                                                            |
| Reina                             | Suzuki       |                       |                  | Jichi Medical University Saitama Med  | Japan                                    |                                                         |                                                                                            |
| Masamitsu                         | Sanui        |                       |                  | Jichi Medical University Saitama Med  | Japan                                    |                                                         |                                                                                            |
| Sho                               | Horikita     |                       |                  | Jichi Medical University Saitama Med  | Japan                                    |                                                         |                                                                                            |
| Yuki                              | Itagaki      |                       |                  | Sapporo City General Hospital         | Japan                                    |                                                         |                                                                                            |
| Akira                             | Kodate       |                       |                  | Sapporo City General Hospital         | Japan                                    |                                                         |                                                                                            |

## Supplemental Online Content: Nonauthor Collaborators

\*Indicates required information. Only first name, last name, and suffix will appear in PubMed.

| *First Name and Middle Initial(s) | *Last Name          | *Suffix (eg, Jr, III) | Academic Degrees | Institution                           | Location (city, state/province, country) | Role or Contribution, eg, chair, principal investigator | Group (if more than 1 Group listed in the byline) and/or Subgroup (eg, Steering Committee) |
|-----------------------------------|---------------------|-----------------------|------------------|---------------------------------------|------------------------------------------|---------------------------------------------------------|--------------------------------------------------------------------------------------------|
| Yuki                              | Takahashi           |                       |                  | Sapporo City General Hospital         | Japan                                    |                                                         |                                                                                            |
| Koyo                              | Moriki              |                       |                  | Sapporo City General Hospital         | Japan                                    |                                                         |                                                                                            |
| Takuya                            | Shiga               |                       |                  | Tohoku university hospital            | Japan                                    |                                                         |                                                                                            |
| Yudai                             | Iwasaki             |                       |                  | Tohoku university hospital            | Japan                                    |                                                         |                                                                                            |
| Rene                              | Rodriguez-Gutierrez |                       |                  | Hospital Universitario, Universidad A | Mexico                                   |                                                         |                                                                                            |
| Jose Gerardo                      | Gonzale             |                       |                  | Hospital Universitario, Universidad A | Mexico                                   |                                                         |                                                                                            |
| Alejandro                         | Salcido-Montenegro  |                       |                  | Hospital Universitario, Universidad A | Mexico                                   |                                                         |                                                                                            |
| Adrian                            | Camacho-Ortiz       |                       |                  | Hospital Universitario, Universidad A | Mexico                                   |                                                         |                                                                                            |
| Fatimah                           | Hassan-Hanga        |                       |                  | Aminu Kano Teaching Hospital/Bayer    | Nigeria                                  |                                                         |                                                                                            |
| Hadiza                            | Galadanci           |                       |                  | Aminu Kano Teaching Hospital/Bayer    | Nigeria                                  |                                                         |                                                                                            |
| Abubakar Shehu                    | Gezawa              |                       |                  | Aminu Kano Teaching Hospital/Bayer    | Nigeria                                  |                                                         |                                                                                            |
| Halima                            | Kabir               |                       |                  | Aminu Kano Teaching Hospital/Bayer    | Nigeria                                  |                                                         |                                                                                            |
| Taiwo Gboluwaga                   | Amole               |                       |                  | Aminu Kano Teaching Hospital/Bayer    | Nigeria                                  |                                                         |                                                                                            |
| Dalha Gwarzo                      | Haliru              |                       |                  | Aminu Kano Teaching Hospital/Bayer    | Nigeria                                  |                                                         |                                                                                            |
| Abdullahi S                       | Ibrahim             |                       |                  | Aminu Kano Teaching Hospital/Bayer    | Nigeria                                  |                                                         |                                                                                            |
| Muhammad Sohaib                   | Asghar              |                       |                  | Dow University Hospital               | Pakistan                                 |                                                         |                                                                                            |
| Mashaal                           | Syed                |                       |                  | Dow University Hospital               | Pakistan                                 |                                                         |                                                                                            |
| Syed Anosh Ali                    | Naqvi               |                       |                  | Dow University Hospital               | Pakistan                                 |                                                         |                                                                                            |
| Igor Borisovich                   | Zabolotskikh        |                       |                  | Kuban State Medical University with   | Russia                                   |                                                         |                                                                                            |
| Tatiana Sergeevna                 | Musaeva             |                       |                  | Kuban State Medical University with   | Russia                                   |                                                         |                                                                                            |
| Razan K                           | Alamoudi            |                       |                  | King Fahad Armed Forces Hospital      | Saudi Arabia                             |                                                         |                                                                                            |
| Hassan M                          | AlSharif            |                       |                  | King Fahad Armed Forces Hospital      | Saudi Arabia                             |                                                         |                                                                                            |
| Sarah A                           | Almazwaghi          |                       |                  | King Fahad Armed Forces Hospital      | Saudi Arabia                             |                                                         |                                                                                            |
| Mohammed S                        | Elsakran            |                       |                  | King Fahad Armed Forces Hospital      | Saudi Arabia                             |                                                         |                                                                                            |
| Mohamed A                         | Aid                 |                       |                  | King Fahad Armed Forces Hospital      | Saudi Arabia                             |                                                         |                                                                                            |
| Mouaz A                           | Darwich             |                       |                  | King Fahad Armed Forces Hospital      | Saudi Arabia                             |                                                         |                                                                                            |
| Omnia M                           | Hagag               |                       |                  | King Fahad Armed Forces Hospital      | Saudi Arabia                             |                                                         |                                                                                            |
| Salah A                           | Ali                 |                       |                  | King Fahad Armed Forces Hospital      | Saudi Arabia                             |                                                         |                                                                                            |

## Supplemental Online Content: Nonauthor Collaborators

\*Indicates required information. Only first name, last name, and suffix will appear in PubMed.

| *First Name and Middle Initial(s) | *Last Name | *Suffix (eg, Jr, III) | Academic Degrees | Institution                                       | Location (city, state/province, country) | Role or Contribution, eg, chair, principal investigator | Group (if more than 1 Group listed in the byline) and/or Subgroup (eg, Steering Committee) |
|-----------------------------------|------------|-----------------------|------------------|---------------------------------------------------|------------------------------------------|---------------------------------------------------------|--------------------------------------------------------------------------------------------|
| Alona                             | Rocacorba  |                       |                  | King Fahad Armed Forces Hospital                  | Saudi Arabia                             |                                                         |                                                                                            |
| Kathrine                          | Supena     |                       |                  | King Fahad Armed Forces Hospital                  | Saudi Arabia                             |                                                         |                                                                                            |
| Efren Ray                         | Juane      |                       |                  | King Fahad Armed Forces Hospital                  | Saudi Arabia                             |                                                         |                                                                                            |
| Jenalyn                           | Medina     |                       |                  | King Fahad Armed Forces Hospital                  | Saudi Arabia                             |                                                         |                                                                                            |
| Jowany                            | Baduria    |                       |                  | King Fahad Armed Forces Hospital                  | Saudi Arabia                             |                                                         |                                                                                            |
| Marwa Ridha                       | Amer       |                       |                  | King Faisal Specialist Hospital & Research Center | Saudi Arabia                             |                                                         |                                                                                            |
| Mohammed Abdullah                 | Bawazeer   |                       |                  | King Faisal Specialist Hospital & Research Center | Saudi Arabia                             |                                                         |                                                                                            |
| Talal I                           | Dahhan     |                       |                  | King Faisal Specialist Hospital & Research Center | Saudi Arabia                             |                                                         |                                                                                            |
| Eiad                              | Kseibi     |                       |                  | King Faisal Specialist Hospital & Research Center | Saudi Arabia                             |                                                         |                                                                                            |
| Abid Shahzad                      | Butt       |                       |                  | King Faisal Specialist Hospital & Research Center | Saudi Arabia                             |                                                         |                                                                                            |
| Syed Moazzum                      | Khurshid   |                       |                  | King Faisal Specialist Hospital & Research Center | Saudi Arabia                             |                                                         |                                                                                            |
| Muath                             | Rabee      |                       |                  | King Faisal Specialist Hospital & Research Center | Saudi Arabia                             |                                                         |                                                                                            |
| Mohammed                          | Abujazar   |                       |                  | King Faisal Specialist Hospital & Research Center | Saudi Arabia                             |                                                         |                                                                                            |
| Razan K                           | Alghunaim  |                       |                  | King Faisal Specialist Hospital & Research Center | Saudi Arabia                             |                                                         |                                                                                            |
| Maal                              | Abualkhair |                       |                  | King Faisal Specialist Hospital & Research Center | Saudi Arabia                             |                                                         |                                                                                            |
| Abeer Turki                       | AlFirm     |                       |                  | King Faisal Specialist Hospital & Research Center | Saudi Arabia                             |                                                         |                                                                                            |
| Mohammed A                        | Almazyad   |                       |                  | King Saud University                              | Saudi Arabia                             |                                                         |                                                                                            |
| Mohammed I                        | Alarifi    |                       |                  | King Saud University                              | Saudi Arabia                             |                                                         |                                                                                            |
| Jara M                            | Macarambon |                       |                  | King Saud University                              | Saudi Arabia                             |                                                         |                                                                                            |
| Ahmad Abdullah                    | Bukhari    |                       |                  | King Saud University                              | Saudi Arabia                             |                                                         |                                                                                            |
| Hussian A                         | Albahrani  |                       |                  | King Saud University                              | Saudi Arabia                             |                                                         |                                                                                            |
| Kazi N                            | Asfina     |                       |                  | King Saud University                              | Saudi Arabia                             |                                                         |                                                                                            |
| Kaltham M                         | Aldossary  |                       |                  | King Saud University                              | Saudi Arabia                             |                                                         |                                                                                            |
| Marija Zdravkovic                 | Zoran      |                       |                  | CHC Bezanijska kosa                               | Serbia                                   |                                                         |                                                                                            |
| Viseslaz                          | Popadic    |                       |                  | CHC Bezanijska kosa                               | Serbia                                   |                                                         |                                                                                            |
| Slobodan                          | Klasnja    |                       |                  | CHC Bezanijska kosa                               | Serbia                                   |                                                         |                                                                                            |
| Jovana                            | Bojicic    |                       |                  | UMC Zvezdara                                      | Serbia                                   |                                                         |                                                                                            |
| Bojan                             | Kovacevic  |                       |                  | UMC Zvezdara                                      | Serbia                                   |                                                         |                                                                                            |
| Stevanovic                        | Predrag    |                       |                  | University Hospital Center "Dr Dragis             | Serbia                                   |                                                         |                                                                                            |
| Dejan S                           | Stojakov   |                       |                  | University Hospital Center "Dr Dragis             | Serbia                                   |                                                         |                                                                                            |

Supplemental Online Content: Nonauthor Collaborators

\*Indicates required information. Only first name, last name, and suffix will appear in PubMed.

| *First Name and Middle Initial(s) | *Last Name | *Suffix (eg, Jr, III) | Academic Degrees | Institution                           | Location (city, state/province, country) | Role or Contribution, eg, chair, principal investigator | Group (if more than 1 Group listed in the byline) and/or Subgroup (eg, Steering Committee) |
|-----------------------------------|------------|-----------------------|------------------|---------------------------------------|------------------------------------------|---------------------------------------------------------|--------------------------------------------------------------------------------------------|
| Duska K                           | Ignjatovic |                       |                  | University Hospital Center "Dr Dragis | Serbia                                   |                                                         |                                                                                            |
| Suzana C                          | Bojicic    |                       |                  | University Hospital Center "Dr Dragis | Serbia                                   |                                                         |                                                                                            |
| Mariana M                         | Bobos      |                       |                  | University Hospital Center "Dr Dragis | Serbia                                   |                                                         |                                                                                            |
| Irina B                           | Nenadic    |                       |                  | University Hospital Center "Dr Dragis | Serbia                                   |                                                         |                                                                                            |
| Milica S                          | Zaric      |                       |                  | University Hospital Center "Dr Dragis | Serbia                                   |                                                         |                                                                                            |
| Marko D                           | Djuric     |                       |                  | University Hospital Center "Dr Dragis | Serbia                                   |                                                         |                                                                                            |
| Vladimir R                        | Djukic     |                       |                  | University Hospital Center "Dr Dragis | Serbia                                   |                                                         |                                                                                            |
| Santiago Y                        | Teruel     |                       |                  | Hospital Universitario La Paz         | Spain                                    |                                                         |                                                                                            |
| Belen C                           | Martin     |                       |                  | Hospital Universitario La Paz         | Spain                                    |                                                         |                                                                                            |
| Uluhan                            | Sili       |                       |                  | Marmara Univeristy                    | Turkey                                   |                                                         |                                                                                            |
| Huseyin                           | Bilgin     |                       |                  | Marmara Univeristy                    | Turkey                                   |                                                         |                                                                                            |
| Pinar                             | Ay         |                       |                  | Marmara Univeristy                    | Turkey                                   |                                                         |                                                                                            |
| Kenneth W                         | Dodd       |                       |                  | Advocate Christ Medical Center        | United States of America                 |                                                         |                                                                                            |
| Nicholas                          | Goodmanson |                       |                  | Advocate Christ Medical Center        | United States of America                 |                                                         |                                                                                            |
| Kathleen                          | Hesse      |                       |                  | Advocate Christ Medical Center        | United States of America                 |                                                         |                                                                                            |
| Paige                             | Bird       |                       |                  | Advocate Christ Medical Center        | United States of America                 |                                                         |                                                                                            |
| Chauncey                          | Weinert    |                       |                  | Advocate Christ Medical Center        | United States of America                 |                                                         |                                                                                            |
| Nathan                            | Schoenrade |                       |                  | Advocate Christ Medical Center        | United States of America                 |                                                         |                                                                                            |
| Abdulrahman                       | Altaher    |                       |                  | Advocate Christ Medical Center        | United States of America                 |                                                         |                                                                                            |
| Esmael                            | Mayar      |                       |                  | Advocate Christ Medical Center        | United States of America                 |                                                         |                                                                                            |
| Matthew                           | Aronson    |                       |                  | Advocate Christ Medical Center        | United States of America                 |                                                         |                                                                                            |
| Tyler                             | Cooper     |                       |                  | Advocate Christ Medical Center        | United States of America                 |                                                         |                                                                                            |
| Monica                            | Logan      |                       |                  | Advocate Christ Medical Center        | United States of America                 |                                                         |                                                                                            |
| Brianna                           | Miner      |                       |                  | Advocate Christ Medical Center        | United States of America                 |                                                         |                                                                                            |
| Gisele                            | Papo       |                       |                  | Advocate Christ Medical Center        | United States of America                 |                                                         |                                                                                            |
| Eric M                            | Siegal     |                       |                  | Advocate/Aurora St Luke's Medical C   | United States of America                 |                                                         |                                                                                            |
| Phyllis                           | Runningen  |                       |                  | Advocate/Aurora St Luke's Medical C   | United States of America                 |                                                         |                                                                                            |
| Love A                            | Patel      |                       |                  | Allina Health (Abbott Northwestern H  | United States of America                 |                                                         |                                                                                            |
| Roman R                           | Melamed    |                       |                  | Allina Health (Abbott Northwestern H  | United States of America                 |                                                         |                                                                                            |
| David M                           | Tierney    |                       |                  | Allina Health (Abbott Northwestern H  | United States of America                 |                                                         |                                                                                            |
| Vino S                            | Raj        |                       |                  | Allina Health (Abbott Northwestern H  | United States of America                 |                                                         |                                                                                            |

Supplemental Online Content: Nonauthor Collaborators

\*Indicates required information. Only first name, last name, and suffix will appear in PubMed.

| *First Name and Middle Initial(s) | *Last Name | *Suffix (eg, Jr, III) | Academic Degrees | Institution                          | Location (city, state/province, country) | Role or Contribution, eg, chair, principal investigator | Group (if more than 1 Group listed in the byline) and/or Subgroup (eg, Steering Committee) |
|-----------------------------------|------------|-----------------------|------------------|--------------------------------------|------------------------------------------|---------------------------------------------------------|--------------------------------------------------------------------------------------------|
| Narayana                          | Mazumder   |                       |                  | Allina Health (Abbott Northwestern H | United States of America                 |                                                         |                                                                                            |
| Catherine St                      | Hill       |                       |                  | Allina Health (Abbott Northwestern H | United States of America                 |                                                         |                                                                                            |
| Lisa                              | Kirkland   |                       |                  | Allina Health (Abbott Northwestern H | United States of America                 |                                                         |                                                                                            |
| Nova                              | Schmitz    |                       |                  | Allina Health (Abbott Northwestern H | United States of America                 |                                                         |                                                                                            |
| Alena                             | Sigman     |                       |                  | Allina Health (Abbott Northwestern H | United States of America                 |                                                         |                                                                                            |
| Joan                              | Hall       |                       |                  | Allina Health (Abbott Northwestern H | United States of America                 |                                                         |                                                                                            |
| Abhijit A                         | Raval      |                       |                  | AnMed Health                         | United States of America                 |                                                         |                                                                                            |
| Andrea                            | Franks     |                       |                  | AnMed Health                         | United States of America                 |                                                         |                                                                                            |
| Jennifer M                        | Jarvis     |                       |                  | Ascension St. Mary's Hospital        | United States of America                 |                                                         |                                                                                            |
| Anmol                             | Kharbanda  |                       |                  | Ascension St.Vincent Hospital        | United States of America                 |                                                         |                                                                                            |
| Sunil                             | Jhajhria   |                       |                  | Ascension St.Vincent Hospital        | United States of America                 |                                                         |                                                                                            |
| Zachary                           | Fyffe      |                       |                  | Ascension St.Vincent Hospital        | United States of America                 |                                                         |                                                                                            |
| Stephen                           | Capizzi    |                       |                  | Ascension/St. Thomas Research Instit | United States of America                 |                                                         |                                                                                            |
| Bethany                           | Alicie     |                       |                  | Ascension/St. Thomas Research Instit | United States of America                 |                                                         |                                                                                            |
| Martha                            | Green      |                       |                  | Ascension/St. Thomas Research Instit | United States of America                 |                                                         |                                                                                            |
| Lori                              | Corckarell |                       |                  | Ascension/St. Thomas Research Instit | United States of America                 |                                                         |                                                                                            |
| Amelia                            | Drennan    |                       |                  | Ascension/St. Thomas Research Instit | United States of America                 |                                                         |                                                                                            |
| Kathleen                          | Dubuque    |                       |                  | Ascension/St. Thomas Research Instit | United States of America                 |                                                         |                                                                                            |
| Tonya                             | Fambrough  |                       |                  | Ascension/St. Thomas Research Instit | United States of America                 |                                                         |                                                                                            |
| Nikole                            | Gasaway    |                       |                  | Ascension/St. Thomas Research Instit | United States of America                 |                                                         |                                                                                            |
| Briana                            | Krantz     |                       |                  | Ascension/St. Thomas Research Instit | United States of America                 |                                                         |                                                                                            |
| Peiman                            | Nebi       |                       |                  | Ascension/St. Thomas Research Instit | United States of America                 |                                                         |                                                                                            |
| Jan                               | Orga       |                       |                  | Ascension/St. Thomas Research Instit | United States of America                 |                                                         |                                                                                            |
| Margaret                          | Serfass    |                       |                  | Ascension/St. Thomas Research Instit | United States of America                 |                                                         |                                                                                            |
| Alina                             | Simion     |                       |                  | Ascension/St. Thomas Research Instit | United States of America                 |                                                         |                                                                                            |
| Kimberly                          | Warren     |                       |                  | Ascension/St. Thomas Research Instit | United States of America                 |                                                         |                                                                                            |
| Cassie                            | Wheeler    |                       |                  | Ascension/St. Thomas Research Instit | United States of America                 |                                                         |                                                                                            |
| Cj                                | Woolman    |                       |                  | Ascension/St. Thomas Research Instit | United States of America                 |                                                         |                                                                                            |
| Amy B                             | Christie   |                       |                  | Atrium Health Navicent               | United States of America                 |                                                         |                                                                                            |
| Dennis W                          | Ashley     |                       |                  | Atrium Health Navicent               | United States of America                 |                                                         |                                                                                            |
| Rajani                            | Adiga      |                       |                  | Atrium Health Navicent               | United States of America                 |                                                         |                                                                                            |

## Supplemental Online Content: Nonauthor Collaborators

\*Indicates required information. Only first name, last name, and suffix will appear in PubMed.

| *First Name and Middle Initial(s) | *Last Name        | *Suffix (eg, Jr, III) | Academic Degrees | Institution                       | Location (city, state/province, country) | Role or Contribution, eg, chair, principal investigator | Group (if more than 1 Group listed in the byline) and/or Subgroup (eg, Steering Committee) |
|-----------------------------------|-------------------|-----------------------|------------------|-----------------------------------|------------------------------------------|---------------------------------------------------------|--------------------------------------------------------------------------------------------|
| Andrew S                          | Moyer             |                       |                  | Augusta Health                    | United States of America                 |                                                         |                                                                                            |
| George M                          | Verghese          |                       |                  | Augusta Health                    | United States of America                 |                                                         |                                                                                            |
| Andrea                            | Sikora<br>Newsome |                       |                  | Augusta University Medical Center | United States of America                 |                                                         |                                                                                            |
| Chirsty C                         | Forehand          |                       |                  | Augusta University Medical Center | United States of America                 |                                                         |                                                                                            |
| Rebecca                           | Bruning           |                       |                  | Augusta University Medical Center | United States of America                 |                                                         |                                                                                            |
| Timothy W                         | Jones             |                       |                  | Augusta University Medical Center | United States of America                 |                                                         |                                                                                            |
| Moldovan                          | Sabov             |                       |                  | Aultman Hospital                  | United States of America                 |                                                         |                                                                                            |
| Fatema                            | Zaidi             |                       |                  | Aultman Hospital                  | United States of America                 |                                                         |                                                                                            |
| Fiona                             | Tissavirasingham  |                       |                  | Aultman Hospital                  | United States of America                 |                                                         |                                                                                            |
| Dhatri                            | Malipeddi         |                       |                  | Aultman Hospital                  | United States of America                 |                                                         |                                                                                            |
| Jarrold M                         | Mosier            |                       |                  | Banner University Medical Center  | United States of America                 |                                                         |                                                                                            |
| Karen                             | Lutrick           |                       |                  | Banner University Medical Center  | United States of America                 |                                                         |                                                                                            |
| Beth Salvagio                     | Campbell          |                       |                  | Banner University Medical Center  | United States of America                 |                                                         |                                                                                            |
| Cathleen                          | Wilson            |                       |                  | Banner University Medical Center  | United States of America                 |                                                         |                                                                                            |
| Patrick                           | Rivers            |                       |                  | Banner University Medical Center  | United States of America                 |                                                         |                                                                                            |
| Jonathan                          | Brinks            |                       |                  | Banner University Medical Center  | United States of America                 |                                                         |                                                                                            |
| Mokenge                           | Ndiva Mongoh      |                       |                  | Banner University Medical Center  | United States of America                 |                                                         |                                                                                            |
| Boris                             | Gilson            |                       |                  | Banner University Medical Center  | United States of America                 |                                                         |                                                                                            |
| Donaa Lee                         | Armaignac         |                       |                  | Baptist Health South Florida      | United States of America                 |                                                         |                                                                                            |
| Don                               | Parris            |                       |                  | Baptist Health South Florida      | United States of America                 |                                                         |                                                                                            |
| Maria Pilar                       | Zuniga            |                       |                  | Baptist Health South Florida      | United States of America                 |                                                         |                                                                                            |
| Ilea                              | Vargas            |                       |                  | Baptist Health South Florida      | United States of America                 |                                                         |                                                                                            |
| Viviana                           | Boronat           |                       |                  | Baptist Health South Florida      | United States of America                 |                                                         |                                                                                            |
| Anneka                            | Hutton            |                       |                  | Baptist Health South Florida      | United States of America                 |                                                         |                                                                                            |
| Navneet                           | Kaur              |                       |                  | Baptist Health South Florida      | United States of America                 |                                                         |                                                                                            |
| Prashank                          | Neupane           |                       |                  | Baptist Health South Florida      | United States of America                 |                                                         |                                                                                            |
| Nohemi                            | Sadule-Rios       |                       |                  | Baptist Health South Florida      | United States of America                 |                                                         |                                                                                            |
| Lourdes M                         | Rojas             |                       |                  | Baptist Health South Florida      | United States of America                 |                                                         |                                                                                            |
| Aashish                           | Neupane           |                       |                  | Baptist Health South Florida      | United States of America                 |                                                         |                                                                                            |

## Supplemental Online Content: Nonauthor Collaborators

\*Indicates required information. Only first name, last name, and suffix will appear in PubMed.

| *First Name and Middle Initial(s) | *Last Name   | *Suffix (eg, Jr, III) | Academic Degrees | Institution                           | Location (city, state/province, country) | Role or Contribution, eg, chair, principal investigator | Group (if more than 1 Group listed in the byline) and/or Subgroup (eg, Steering Committee) |
|-----------------------------------|--------------|-----------------------|------------------|---------------------------------------|------------------------------------------|---------------------------------------------------------|--------------------------------------------------------------------------------------------|
| Priscilla                         | Rivera       |                       |                  | Baptist Health South Florida          | United States of America                 |                                                         |                                                                                            |
| Carlos                            | Valle Carlos |                       |                  | Baptist Health South Florida          | United States of America                 |                                                         |                                                                                            |
| Gregory                           | Vincent      |                       |                  | Baptist Health South Florida          | United States of America                 |                                                         |                                                                                            |
| Mahesh                            | Amin         |                       |                  | BayCare Health System                 | United States of America                 |                                                         |                                                                                            |
| Mary E                            | Schelle      |                       |                  | BayCare Health System                 | United States of America                 |                                                         |                                                                                            |
| Amanda                            | Steadham     |                       |                  | BayCare Health System                 | United States of America                 |                                                         |                                                                                            |
| Christopher M                     | Howard       |                       |                  | Baylor College of Medicine, Baylor St | United States of America                 |                                                         |                                                                                            |
| Cameron                           | McBride      |                       |                  | Baylor College of Medicine, Baylor St | United States of America                 |                                                         |                                                                                            |
| Jocelyn                           | Abraham      |                       |                  | Baylor College of Medicine, Baylor St | United States of America                 |                                                         |                                                                                            |
| Orlando                           | Garner       |                       |                  | Baylor College of Medicine, Baylor St | United States of America                 |                                                         |                                                                                            |
| Katherine                         | Richards     |                       |                  | Baylor College of Medicine, Baylor St | United States of America                 |                                                         |                                                                                            |
| Keegan                            | Collins      |                       |                  | Baylor College of Medicine, Baylor St | United States of America                 |                                                         |                                                                                            |
| Preethi                           | Antony       |                       |                  | Baylor College of Medicine, Baylor St | United States of America                 |                                                         |                                                                                            |
| Sindhu                            | Mathew       |                       |                  | Baylor College of Medicine, Baylor St | United States of America                 |                                                         |                                                                                            |
| Valerie                           | Danesh       |                       |                  | Baylor Scott & White Health           | United States of America                 |                                                         |                                                                                            |
| Gueorgui                          | Dubrocq      |                       |                  | Baylor Scott & White Health           | United States of America                 |                                                         |                                                                                            |
| Amber L                           | Davis        |                       |                  | Baylor Scott & White Health           | United States of America                 |                                                         |                                                                                            |
| Marissa J                         | Hammers      |                       |                  | Baylor Scott & White Health           | United States of America                 |                                                         |                                                                                            |
| Ill M                             | McGahey      |                       |                  | Baylor Scott & White Health           | United States of America                 |                                                         |                                                                                            |
| Amanda C                          | Farris       |                       |                  | Baylor Scott & White Health           | United States of America                 |                                                         |                                                                                            |
| Elisa                             | Priest       |                       |                  | Baylor Scott & White Health           | United States of America                 |                                                         |                                                                                            |
| Robyn                             | Korsmo       |                       |                  | Baylor Scott & White Health           | United States of America                 |                                                         |                                                                                            |
| Lorie                             | Fares        |                       |                  | Baylor Scott & White Health           | United States of America                 |                                                         |                                                                                            |
| Kathy                             | Skiles       |                       |                  | Baylor Scott & White Health           | United States of America                 |                                                         |                                                                                            |
| Susan M                           | Shor         |                       |                  | Baylor Scott & White Health           | United States of America                 |                                                         |                                                                                            |
| Kenya                             | Burns        |                       |                  | Baylor Scott & White Health           | United States of America                 |                                                         |                                                                                            |
| Melody                            | Flores       |                       |                  | Baylor Scott & White Health           | United States of America                 |                                                         |                                                                                            |
| Lindsay                           | Newman       |                       |                  | Baylor Scott & White Health           | United States of America                 |                                                         |                                                                                            |
| Debora A                          | Wilk         |                       |                  | Baylor Scott & White Health           | United States of America                 |                                                         |                                                                                            |
| Jason                             | Ettlinger    |                       |                  | Baylor Scott & White Health           | United States of America                 |                                                         |                                                                                            |
| Jaccallene                        | Bomar        |                       |                  | Baylor Scott & White Health           | United States of America                 |                                                         |                                                                                            |



## Supplemental Online Content: Nonauthor Collaborators

\*Indicates required information. Only first name, last name, and suffix will appear in PubMed.

| *First Name and Middle Initial(s) | *Last Name  | *Suffix (eg, Jr, III) | Academic Degrees | Institution                          | Location (city, state/province, country) | Role or Contribution, eg, chair, principal investigator | Group (if more than 1 Group listed in the byline) and/or Subgroup (eg, Steering Committee) |
|-----------------------------------|-------------|-----------------------|------------------|--------------------------------------|------------------------------------------|---------------------------------------------------------|--------------------------------------------------------------------------------------------|
| Himani                            | Darji       |                       |                  | Baylor Scott & White Health          | United States of America                 |                                                         |                                                                                            |
| Alejandro                         | Arroliga    |                       |                  | Baylor Scott & White Health          | United States of America                 |                                                         |                                                                                            |
| Corrie A                          | Dowell      |                       |                  | Baylor Scott & White Health          | United States of America                 |                                                         |                                                                                            |
| Gabriela Hope                     | Gonzales    |                       |                  | Baylor Scott & White Health          | United States of America                 |                                                         |                                                                                            |
| Melody Flores                     | Flores      |                       |                  | Baylor Scott & White Health          | United States of America                 |                                                         |                                                                                            |
| Lindsay                           | Newman      |                       |                  | Baylor Scott & White Health          | United States of America                 |                                                         |                                                                                            |
| Allan j                           | Walkey      |                       |                  | Boston University School of Medicine | United States of America                 |                                                         |                                                                                            |
| Sushrut S                         | Waikar      |                       |                  | Boston University School of Medicine | United States of America                 |                                                         |                                                                                            |
| Michael A                         | Garcia      |                       |                  | Boston University School of Medicine | United States of America                 |                                                         |                                                                                            |
| Mia                               | Colona      |                       |                  | Boston University School of Medicine | United States of America                 |                                                         |                                                                                            |
| Zoe                               | Kibbelaar   |                       |                  | Boston University School of Medicine | United States of America                 |                                                         |                                                                                            |
| Michael                           | Leong       |                       |                  | Boston University School of Medicine | United States of America                 |                                                         |                                                                                            |
| Daniel                            | Wallman     |                       |                  | Boston University School of Medicine | United States of America                 |                                                         |                                                                                            |
| Kanupriya                         | Soni        |                       |                  | Boston University School of Medicine | United States of America                 |                                                         |                                                                                            |
| Jennifer                          | Maccarone   |                       |                  | Boston University School of Medicine | United States of America                 |                                                         |                                                                                            |
| Joshua                            | Gilman      |                       |                  | Boston University School of Medicine | United States of America                 |                                                         |                                                                                            |
| Ycar                              | Devis       |                       |                  | Boston University School of Medicine | United States of America                 |                                                         |                                                                                            |
| Joseph                            | Chung       |                       |                  | Boston University School of Medicine | United States of America                 |                                                         |                                                                                            |
| Munizay                           | Paracha     |                       |                  | Boston University School of Medicine | United States of America                 |                                                         |                                                                                            |
| David N                           | Lumelsky    |                       |                  | Boston University School of Medicine | United States of America                 |                                                         |                                                                                            |
| Madeline                          | DiLorenzo   |                       |                  | Boston University School of Medicine | United States of America                 |                                                         |                                                                                            |
| Najla                             | Abdurrahman |                       |                  | Boston University School of Medicine | United States of America                 |                                                         |                                                                                            |
| Shelsey                           | Johnson     |                       |                  | Boston University School of Medicine | United States of America                 |                                                         |                                                                                            |
| Maj Andrew M                      | Hersh       |                       |                  | Brooke Amry Medical Center           | United States of America                 |                                                         |                                                                                            |
| Stephanie L                       | Wachs       |                       |                  | Brooke Amry Medical Center           | United States of America                 |                                                         |                                                                                            |
| Brittany S                        | Swigger     |                       |                  | Brooke Amry Medical Center           | United States of America                 |                                                         |                                                                                            |
| Lauren A                          | Sattler     |                       |                  | Brooke Amry Medical Center           | United States of America                 |                                                         |                                                                                            |
| Michael N                         | Moulton     |                       |                  | Brooke Amry Medical Center           | United States of America                 |                                                         |                                                                                            |
| Kimberly                          | Zammit      |                       |                  | Buffalo General Medical Center       | United States of America                 |                                                         |                                                                                            |
| Patrick J                         | McGrath     |                       |                  | Buffalo General Medical Center       | United States of America                 |                                                         |                                                                                            |
| William                           | Loeffler    |                       |                  | Buffalo General Medical Center       | United States of America                 |                                                         |                                                                                            |

Supplemental Online Content: Nonauthor Collaborators

\*Indicates required information. Only first name, last name, and suffix will appear in PubMed.

| *First Name and Middle Initial(s) | *Last Name | *Suffix (eg, Jr, III) | Academic Degrees | Institution                           | Location (city, state/province, country) | Role or Contribution, eg, chair, principal investigator | Group (if more than 1 Group listed in the byline) and/or Subgroup (eg, Steering Committee) |
|-----------------------------------|------------|-----------------------|------------------|---------------------------------------|------------------------------------------|---------------------------------------------------------|--------------------------------------------------------------------------------------------|
| Maya R                            | Chilbert   |                       |                  | Buffalo General Medical Center        | United States of America                 |                                                         |                                                                                            |
| Raghavendra                       | Tirupathi  |                       |                  | Chambersburg Hospital                 | United States of America                 |                                                         |                                                                                            |
| Alymer                            | Tang       |                       |                  | Chambersburg Hospital                 | United States of America                 |                                                         |                                                                                            |
| Arshad                            | Safi       |                       |                  | Chambersburg Hospital                 | United States of America                 |                                                         |                                                                                            |
| Cindy                             | Green      |                       |                  | Chambersburg Hospital                 | United States of America                 |                                                         |                                                                                            |
| Jackie                            | Newell     |                       |                  | Chambersburg Hospital                 | United States of America                 |                                                         |                                                                                            |
| Naga                              | Ramani     |                       |                  | Chambersburg Hospital                 | United States of America                 |                                                         |                                                                                            |
| Bhavani Harika                    | Ganti      |                       |                  | Chambersburg Hospital                 | United States of America                 |                                                         |                                                                                            |
| Rayan E                           | Ihle       |                       |                  | Charleston Area Medical Center        | United States of America                 |                                                         |                                                                                            |
| Elaine A                          | Davis      |                       |                  | Charleston Area Medical Center        | United States of America                 |                                                         |                                                                                            |
| Shelda A                          | Martin     |                       |                  | Charleston Area Medical Center        | United States of America                 |                                                         |                                                                                            |
| Imran A                           | Sayed      |                       |                  | Children's Hospital Colorado, Univers | United States of America                 |                                                         |                                                                                            |
| Katja M                           | Gist       |                       |                  | Children's Hospital Colorado, Univers | United States of America                 |                                                         |                                                                                            |
| Larisa                            | Strom      |                       |                  | Children's Hospital Colorado, Univers | United States of America                 |                                                         |                                                                                            |
| Kathleen                          | Chiotos    |                       |                  | Children's Hospital Colorado, Univers | United States of America                 |                                                         |                                                                                            |
| Allison M                         | Blatz      |                       |                  | Children's Hospital of Philadelphia   | United States of America                 |                                                         |                                                                                            |
| Giyong                            | Lee        |                       |                  | Children's Hospital of Philadelphia   | United States of America                 |                                                         |                                                                                            |
| Ryan H                            | Burnett    |                       |                  | Children's Hospital of Philadelphia   | United States of America                 |                                                         |                                                                                            |
| Guy I                             | Sydney     |                       |                  | Children's Hospital of Philadelphia   | United States of America                 |                                                         |                                                                                            |
| Danielle M                        | Traynor    |                       |                  | Children's Hospital of Philadelphia   | United States of America                 |                                                         |                                                                                            |
| Salim                             | Surani     |                       |                  | Christus Spohn Shoreline Corpus Chri  | United States of America                 |                                                         |                                                                                            |
| Joshua                            | White      |                       |                  | Christus Spohn Shoreline Corpus Chri  | United States of America                 |                                                         |                                                                                            |
| Aftab                             | Khan       |                       |                  | Christus Spohn Shoreline Corpus Chri  | United States of America                 |                                                         |                                                                                            |
| Rahul                             | Dhahwal    |                       |                  | Christus Spohn Shoreline Corpus Chri  | United States of America                 |                                                         |                                                                                            |
| Sreekanth                         | Cheruku    |                       |                  | Clement Universit Hospital at UT Sou  | United States of America                 |                                                         |                                                                                            |
| Farzin                            | Ahmed      |                       |                  | Clement Universit Hospital at UT Sou  | United States of America                 |                                                         |                                                                                            |
| Chrispoter                        | Deonarine  |                       |                  | Clement Universit Hospital at UT Sou  | United States of America                 |                                                         |                                                                                            |
| Ashley                            | Jones      |                       |                  | Clement Universit Hospital at UT Sou  | United States of America                 |                                                         |                                                                                            |
| Mohammad Ali                      | Shaikh     |                       |                  | Clement Universit Hospital at UT Sou  | United States of America                 |                                                         |                                                                                            |
| David                             | Preston    |                       |                  | Clement Universit Hospital at UT Sou  | United States of America                 |                                                         |                                                                                            |
| Jeanette                          | Chin       |                       |                  | Clement Universit Hospital at UT Sou  | United States of America                 |                                                         |                                                                                            |

Supplemental Online Content: Nonauthor Collaborators

\*Indicates required information. Only first name, last name, and suffix will appear in PubMed.

| *First Name and Middle Initial(s) | *Last Name         | *Suffix (eg, Jr, III) | Academic Degrees | Institution                          | Location (city, state/province, country) | Role or Contribution, eg, chair, principal investigator | Group (if more than 1 Group listed in the byline) and/or Subgroup (eg, Steering Committee) |
|-----------------------------------|--------------------|-----------------------|------------------|--------------------------------------|------------------------------------------|---------------------------------------------------------|--------------------------------------------------------------------------------------------|
| Vidula                            | Vachharajani       |                       |                  | Cleveland Clinic (Main Campus, Fairv | United States of America                 |                                                         |                                                                                            |
| Abhijit                           | Duggal             |                       |                  | Cleveland Clinic (Main Campus, Fairv | United States of America                 |                                                         |                                                                                            |
| Prabalini                         | Rajendram          |                       |                  | Cleveland Clinic (Main Campus, Fairv | United States of America                 |                                                         |                                                                                            |
| Omar                              | Mehkri             |                       |                  | Cleveland Clinic (Main Campus, Fairv | United States of America                 |                                                         |                                                                                            |
| Siddharth                         | Dugar              |                       |                  | Cleveland Clinic (Main Campus, Fairv | United States of America                 |                                                         |                                                                                            |
| Michelle                          | Biehl              |                       |                  | Cleveland Clinic (Main Campus, Fairv | United States of America                 |                                                         |                                                                                            |
| Gretchen                          | Sacha              |                       |                  | Cleveland Clinic (Main Campus, Fairv | United States of America                 |                                                         |                                                                                            |
| Stuart                            | Houltham           |                       |                  | Cleveland Clinic (Main Campus, Fairv | United States of America                 |                                                         |                                                                                            |
| Alexander                         | Kind               |                       |                  | Cleveland Clinic (Main Campus, Fairv | United States of America                 |                                                         |                                                                                            |
| Kiran                             | Ashok              |                       |                  | Cleveland Clinic (Main Campus, Fairv | United States of America                 |                                                         |                                                                                            |
| Bryan                             | Poynter            |                       |                  | Cleveland Clinic (Main Campus, Fairv | United States of America                 |                                                         |                                                                                            |
| Mary E                            | Beukemann          |                       |                  | Cleveland Clinic (Main Campus, Fairv | United States of America                 |                                                         |                                                                                            |
| Richard                           | Rice               |                       |                  | Cleveland Clinic (Main Campus, Fairv | United States of America                 |                                                         |                                                                                            |
| Susan                             | Gole               |                       |                  | Cleveland Clinic (Main Campus, Fairv | United States of America                 |                                                         |                                                                                            |
| Valerie                           | Shaner             |                       |                  | Cleveland Clinic (Main Campus, Fairv | United States of America                 |                                                         |                                                                                            |
| Adarsh                            | Conjeevaram        |                       |                  | Cleveland Clinic (Main Campus, Fairv | United States of America                 |                                                         |                                                                                            |
| Michlelle                         | Ferrari            |                       |                  | Cleveland Clinic (Main Campus, Fairv | United States of America                 |                                                         |                                                                                            |
| Narendrakumar                     | Alappan            |                       |                  | Cleveland Clinic (Main Campus, Fairv | United States of America                 |                                                         |                                                                                            |
| Steven                            | Minear             |                       |                  | Cleveland Clinic (Main Campus, Fairv | United States of America                 |                                                         |                                                                                            |
| Jaime                             | Hernandez-Montfort |                       |                  | Cleveland Clinic (Main Campus, Fairv | United States of America                 |                                                         |                                                                                            |
| Syed Sohaib                       | Nasim              |                       |                  | Cleveland Clinic (Main Campus, Fairv | United States of America                 |                                                         |                                                                                            |
| Ravi                              | Sunderkrishnan     |                       |                  | Cleveland Clinic (Main Campus, Fairv | United States of America                 |                                                         |                                                                                            |
| Debasis                           | Sahoo              |                       |                  | Cleveland Clinic (Main Campus, Fairv | United States of America                 |                                                         |                                                                                            |
| Patrick S                         | Milligan           |                       |                  | Community Health Network Indianap    | United States of America                 |                                                         |                                                                                            |
| Sandeep K                         | Gupta              |                       |                  | Community Health Network Indianap    | United States of America                 |                                                         |                                                                                            |
| Joy M                             | Koglin             |                       |                  | Community Health Network Indianap    | United States of America                 |                                                         |                                                                                            |
| Regina                            | Gibson             |                       |                  | Community Health Network Indianap    | United States of America                 |                                                         |                                                                                            |
| Lana                              | Johnson            |                       |                  | Community Health Network Indianap    | United States of America                 |                                                         |                                                                                            |
| Felicia                           | Preston            |                       |                  | Community Health Network Indianap    | United States of America                 |                                                         |                                                                                            |

Supplemental Online Content: Nonauthor Collaborators

\*Indicates required information. Only first name, last name, and suffix will appear in PubMed.

| *First Name and Middle Initial(s) | *Last Name     | *Suffix (eg, Jr, III) | Academic Degrees | Institution                       | Location (city, state/province, country) | Role or Contribution, eg, chair, principal investigator | Group (if more than 1 Group listed in the byline) and/or Subgroup (eg, Steering Committee) |
|-----------------------------------|----------------|-----------------------|------------------|-----------------------------------|------------------------------------------|---------------------------------------------------------|--------------------------------------------------------------------------------------------|
| Crimson                           | Scott          |                       |                  | Community Health Network Indianap | United States of America                 |                                                         |                                                                                            |
| Bethany                           | Nungester      |                       |                  | Community Health Network Indianap | United States of America                 |                                                         |                                                                                            |
| Dana D                            | Byrne          |                       |                  | Cooper Univeristy Health Care     | United States of America                 |                                                         |                                                                                            |
| Christa A                         | Schorr         |                       |                  | Cooper Univeristy Health Care     | United States of America                 |                                                         |                                                                                            |
| Katie                             | Grant          |                       |                  | Cooper Univeristy Health Care     | United States of America                 |                                                         |                                                                                            |
| Katherine L                       | Doktar         |                       |                  | Cooper Univeristy Health Care     | United States of America                 |                                                         |                                                                                            |
| Maura C                           | Porto          |                       |                  | Cooper Univeristy Health Care     | United States of America                 |                                                         |                                                                                            |
| Olgo                              | Kaplan         |                       |                  | Cooper Univeristy Health Care     | United States of America                 |                                                         |                                                                                            |
| James E                           | Siegler        |                       |                  | Cooper Univeristy Health Care     | United States of America                 |                                                         |                                                                                            |
| Brian                             | Schonewald     |                       |                  | Cooper Univeristy Health Care     | United States of America                 |                                                         |                                                                                            |
| Ashley                            | Woodford       |                       |                  | Cooper Univeristy Health Care     | United States of America                 |                                                         |                                                                                            |
| Alan                              | Tsai           |                       |                  | Cooper Univeristy Health Care     | United States of America                 |                                                         |                                                                                            |
| Savina                            | Reid           |                       |                  | Cooper Univeristy Health Care     | United States of America                 |                                                         |                                                                                            |
| Kuntal                            | Bhowmick       |                       |                  | Cooper Univeristy Health Care     | United States of America                 |                                                         |                                                                                            |
| Saba                              | Daneshpooy     |                       |                  | Cooper Univeristy Health Care     | United States of America                 |                                                         |                                                                                            |
| Cyrus                             | Mowdawalla     |                       |                  | Cooper Univeristy Health Care     | United States of America                 |                                                         |                                                                                            |
| Trishna Akshay                    | Dave           |                       |                  | Cooper Univeristy Health Care     | United States of America                 |                                                         |                                                                                            |
| Wilhemina Kennedy                 | Connor Crudeli |                       |                  | Cooper Univeristy Health Care     | United States of America                 |                                                         |                                                                                            |
| Chirstopher                       | Ferry          |                       |                  | Cooper Univeristy Health Care     | United States of America                 |                                                         |                                                                                            |
| Long                              | Nguyen         |                       |                  | Cooper Univeristy Health Care     | United States of America                 |                                                         |                                                                                            |
| Sneha                             | Modi           |                       |                  | Cooper Univeristy Health Care     | United States of America                 |                                                         |                                                                                            |
| Niharika                          | Padala         |                       |                  | Cooper Univeristy Health Care     | United States of America                 |                                                         |                                                                                            |
| Pavan Jitendra                    | Patel          |                       |                  | Cooper Univeristy Health Care     | United States of America                 |                                                         |                                                                                            |
| Belle                             | Lin            |                       |                  | Cooper Univeristy Health Care     | United States of America                 |                                                         |                                                                                            |
| Jamie                             | Qiuyun         |                       |                  | Cooper Univeristy Health Care     | United States of America                 |                                                         |                                                                                            |
| Fan Mandi                         | Liu            |                       |                  | Cooper Univeristy Health Care     | United States of America                 |                                                         |                                                                                            |
| Rasagna                           | Kota           |                       |                  | Cooper Univeristy Health Care     | United States of America                 |                                                         |                                                                                            |
| Annesha                           | Banerjee       |                       |                  | Cooper Univeristy Health Care     | United States of America                 |                                                         |                                                                                            |
| Steven K                          | Daugherty      |                       |                  | Coz Medical Center Springfield    | United States of America                 |                                                         |                                                                                            |
| Sam                               | Atkinson       |                       |                  | Coz Medical Center Springfield    | United States of America                 |                                                         |                                                                                            |

## Supplemental Online Content: Nonauthor Collaborators

\*Indicates required information. Only first name, last name, and suffix will appear in PubMed.

| *First Name and Middle Initial(s) | *Last Name     | *Suffix (eg, Jr, III) | Academic Degrees | Institution                     | Location (city, state/province, country) | Role or Contribution, eg, chair, principal investigator | Group (if more than 1 Group listed in the byline) and/or Subgroup (eg, Steering Committee) |
|-----------------------------------|----------------|-----------------------|------------------|---------------------------------|------------------------------------------|---------------------------------------------------------|--------------------------------------------------------------------------------------------|
| Kelly                             | Shrimpton      |                       |                  | Coz Medical Center Springfield  | United States of America                 |                                                         |                                                                                            |
| Sidney                            | Ontai          |                       |                  | Detar Family Medicine Residency | United States of America                 |                                                         |                                                                                            |
| Brian                             | Contreras      |                       |                  | Detar Family Medicine Residency | United States of America                 |                                                         |                                                                                            |
| Uzoma                             | Obinwanko      |                       |                  | Detar Family Medicine Residency | United States of America                 |                                                         |                                                                                            |
| Nneka                             | Amamasi        |                       |                  | Detar Family Medicine Residency | United States of America                 |                                                         |                                                                                            |
| Amir                              | Sharafi        |                       |                  | Detar Family Medicine Residency | United States of America                 |                                                         |                                                                                            |
| Sarah                             | Lee            |                       |                  | Detroit Medical Centre          | United States of America                 |                                                         |                                                                                            |
| Zahia                             | Esber          |                       |                  | Detroit Medical Centre          | United States of America                 |                                                         |                                                                                            |
| Chetna                            | Jinjvadia      |                       |                  | Detroit Medical Centre          | United States of America                 |                                                         |                                                                                            |
| Raquel R                          | Bartz          |                       |                  | Duke University Hospital        | United States of America                 |                                                         |                                                                                            |
| Vijay                             | Krishnamoorthy |                       |                  | Duke University Hospital        | United States of America                 |                                                         |                                                                                            |
| Bryan                             | Kraft          |                       |                  | Duke University Hospital        | United States of America                 |                                                         |                                                                                            |
| Aaron                             | Pulsipher      |                       |                  | Duke University Hospital        | United States of America                 |                                                         |                                                                                            |
| Eugene                            | Friedman       |                       |                  | Duke University Hospital        | United States of America                 |                                                         |                                                                                            |
| Sachin                            | Mehta          |                       |                  | Duke University Hospital        | United States of America                 |                                                         |                                                                                            |
| Margit                            | Kaufman        |                       |                  | Englewood Health                | United States of America                 |                                                         |                                                                                            |
| Gregg                             | Lobel          |                       |                  | Englewood Health                | United States of America                 |                                                         |                                                                                            |
| Nisha                             | Gandhi         |                       |                  | Englewood Health                | United States of America                 |                                                         |                                                                                            |
| Amr                               | Abdelaty       |                       |                  | Englewood Health                | United States of America                 |                                                         |                                                                                            |
| Elizabeth                         | Shaji          |                       |                  | Englewood Health                | United States of America                 |                                                         |                                                                                            |
| Kiana                             | Lim            |                       |                  | Englewood Health                | United States of America                 |                                                         |                                                                                            |
| Juan                              | Marte          |                       |                  | Englewood Health                | United States of America                 |                                                         |                                                                                            |
| Dani Ashley                       | Sosa           |                       |                  | Englewood Health                | United States of America                 |                                                         |                                                                                            |
| David P                           | Yamane         |                       |                  | Geroge Washington University    | United States of America                 |                                                         |                                                                                            |
| Ivy                               | Benjenk        |                       |                  | Geroge Washington University    | United States of America                 |                                                         |                                                                                            |
| Nivedita                          | Prasanna       |                       |                  | Geroge Washington University    | United States of America                 |                                                         |                                                                                            |
| Nicholas                          | Perkins        |                       |                  | Greenville Memorial Hospital    | United States of America                 |                                                         |                                                                                            |
| Prera J                           | Roth           |                       |                  | Greenville Memorial Hospital    | United States of America                 |                                                         |                                                                                            |
| Alain                             | Litwin         |                       |                  | Greenville Memorial Hospital    | United States of America                 |                                                         |                                                                                            |
| Ananda                            | Pariyadath     |                       |                  | Greenville Memorial Hospital    | United States of America                 |                                                         |                                                                                            |

Supplemental Online Content: Nonauthor Collaborators

\*Indicates required information. Only first name, last name, and suffix will appear in PubMed.

| *First Name and Middle Initial(s) | *Last Name  | *Suffix (eg, Jr, III) | Academic Degrees | Institution                       | Location (city, state/province, country) | Role or Contribution, eg, chair, principal investigator | Group (if more than 1 Group listed in the byline) and/or Subgroup (eg, Steering Committee) |
|-----------------------------------|-------------|-----------------------|------------------|-----------------------------------|------------------------------------------|---------------------------------------------------------|--------------------------------------------------------------------------------------------|
| Phillip                           | Moschella   |                       |                  | Greenville Memorial Hospital      | United States of America                 |                                                         |                                                                                            |
| Trayson                           | Llano       |                       |                  | Greenville Memorial Hospital      | United States of America                 |                                                         |                                                                                            |
| Christine                         | Waller      |                       |                  | Gundersen Health System La Crosse | United States of America                 |                                                         |                                                                                            |
| Kara                              | Kallies     |                       |                  | Gundersen Health System La Crosse | United States of America                 |                                                         |                                                                                            |
| Christine                         | Waller      |                       |                  | Gundersen Health System La Crosse | United States of America                 |                                                         |                                                                                            |
| Jonean                            | Thorsen     |                       |                  | Gundersen Health System La Crosse | United States of America                 |                                                         |                                                                                            |
| Alec                              | Fitzsimmons |                       |                  | Gundersen Health System La Crosse | United States of America                 |                                                         |                                                                                            |
| Haley                             | Olsen       |                       |                  | Gundersen Health System La Crosse | United States of America                 |                                                         |                                                                                            |
| Normal                            | Smalls      |                       |                  | Howard University Hospital        | United States of America                 |                                                         |                                                                                            |
| Steven Q                          | Davis       |                       |                  | JPS Health Network                | United States of America                 |                                                         |                                                                                            |
| Valentina                         | Jovic       |                       |                  | JPS Health Network                | United States of America                 |                                                         |                                                                                            |
| Max                               | Masuda      |                       |                  | JPS Health Network                | United States of America                 |                                                         |                                                                                            |
| Amanda                            | Hayes       |                       |                  | JPS Health Network                | United States of America                 |                                                         |                                                                                            |
| Katharine                         | Nault       |                       |                  | Lahey Hospital & Medical Center   | United States of America                 |                                                         |                                                                                            |
| Michael                           | Smith       |                       |                  | Lakes Region General Hospital     | United States of America                 |                                                         |                                                                                            |
| William                           | Snow        |                       |                  | Lakes Region General Hospital     | United States of America                 |                                                         |                                                                                            |
| Riley                             | Liptak      |                       |                  | Lakes Region General Hospital     | United States of America                 |                                                         |                                                                                            |
| Hannah                            | Durant      |                       |                  | Lakes Region General Hospital     | United States of America                 |                                                         |                                                                                            |
| Valerie                           | Pendleton   |                       |                  | Lakes Region General Hospital     | United States of America                 |                                                         |                                                                                            |
| Alay                              | Nanavati    |                       |                  | Lakes Region General Hospital     | United States of America                 |                                                         |                                                                                            |
| Risa                              | Mrozowsk    |                       |                  | Lakes Region General Hospital     | United States of America                 |                                                         |                                                                                            |
| Erica                             | Doubleday   |                       |                  | Lakes Region General Hospital     | United States of America                 |                                                         |                                                                                            |
| Yuk Min                           | Liu         |                       |                  | Loyola University Medical Center  | United States of America                 |                                                         |                                                                                            |
| Sarah                             | Zavala      |                       |                  | Loyola University Medical Center  | United States of America                 |                                                         |                                                                                            |
| Esther                            | Shim        |                       |                  | Loyola University Medical Center  | United States of America                 |                                                         |                                                                                            |
| Ronald A                          | Reilkoff    |                       |                  | M Health - Fairview               | United States of America                 |                                                         |                                                                                            |
| Julia A                           | Heneghan    |                       |                  | M Health - Fairview               | United States of America                 |                                                         |                                                                                            |
| Sarah                             | Eichen      |                       |                  | M Health - Fairview               | United States of America                 |                                                         |                                                                                            |
| Lexie                             | Goertzen    |                       |                  | M Health - Fairview               | United States of America                 |                                                         |                                                                                            |
| Scott                             | Rajala      |                       |                  | M Health - Fairview               | United States of America                 |                                                         |                                                                                            |
| Ghislaine                         | Feussom     |                       |                  | M Health - Fairview               | United States of America                 |                                                         |                                                                                            |

## Supplemental Online Content: Nonauthor Collaborators

\*Indicates required information. Only first name, last name, and suffix will appear in PubMed.

| *First Name and Middle Initial(s) | *Last Name     | *Suffix (eg, Jr, III) | Academic Degrees | Institution                      | Location (city, state/province, country) | Role or Contribution, eg, chair, principal investigator | Group (if more than 1 Group listed in the byline) and/or Subgroup (eg, Steering Committee) |
|-----------------------------------|----------------|-----------------------|------------------|----------------------------------|------------------------------------------|---------------------------------------------------------|--------------------------------------------------------------------------------------------|
| Ben                               | Tang           |                       |                  | M Health - Fairview              | United States of America                 |                                                         |                                                                                            |
| Christine C                       | Junia          |                       |                  | MacNeal Hospital Loyola Medicine | United States of America                 |                                                         |                                                                                            |
| Robert                            | Lichtenberg    |                       |                  | MacNeal Hospital Loyola Medicine | United States of America                 |                                                         |                                                                                            |
| Hasrat                            | Sidhu          |                       |                  | MacNeal Hospital Loyola Medicine | United States of America                 |                                                         |                                                                                            |
| Diana                             | Espinoza       |                       |                  | MacNeal Hospital Loyola Medicine | United States of America                 |                                                         |                                                                                            |
| Shelden                           | Rodrigues      |                       |                  | MacNeal Hospital Loyola Medicine | United States of America                 |                                                         |                                                                                            |
| Marai Jose                        | Zabala         |                       |                  | MacNeal Hospital Loyola Medicine | United States of America                 |                                                         |                                                                                            |
| Daniela                           | Goyes          |                       |                  | MacNeal Hospital Loyola Medicine | United States of America                 |                                                         |                                                                                            |
| Ammu                              | Susheela       |                       |                  | MacNeal Hospital Loyola Medicine | United States of America                 |                                                         |                                                                                            |
| Buddhi                            | Hatharaliyadda |                       |                  | MacNeal Hospital Loyola Medicine | United States of America                 |                                                         |                                                                                            |
| Naveen                            | Rameshkumar    |                       |                  | MacNeal Hospital Loyola Medicine | United States of America                 |                                                         |                                                                                            |
| Amulya                            | Kasireddy      |                       |                  | MacNeal Hospital Loyola Medicine | United States of America                 |                                                         |                                                                                            |
| Genessis                          | Maldonado      |                       |                  | MacNeal Hospital Loyola Medicine | United States of America                 |                                                         |                                                                                            |
| Lisseth                           | Beltran        |                       |                  | MacNeal Hospital Loyola Medicine | United States of America                 |                                                         |                                                                                            |
| Akshata                           | Chaugule       |                       |                  | MacNeal Hospital Loyola Medicine | United States of America                 |                                                         |                                                                                            |
| Hassan                            | Khan           |                       |                  | MacNeal Hospital Loyola Medicine | United States of America                 |                                                         |                                                                                            |
| Namrata                           | Patil          |                       |                  | Mass General Brigham Hospital    | United States of America                 |                                                         |                                                                                            |
| Ruhi                              | Patil          |                       |                  | Mass General Brigham Hospital    | United States of America                 |                                                         |                                                                                            |
| Rodrigo                           | Cartin-Ceba    |                       |                  | Mayo Clinic Arizona              | United States of America                 |                                                         |                                                                                            |
| Ayan                              | Sen            |                       |                  | Mayo Clinic Arizona              | United States of America                 |                                                         |                                                                                            |
| Fahimeh                           | Talaei         |                       |                  | Mayo Clinic Arizona              | United States of America                 |                                                         |                                                                                            |
| Rahul                             | Kashyap        |                       |                  | Mayo Clinic Rochester            | United States of America                 |                                                         |                                                                                            |
| Juan                              | Pablo Domecq   |                       |                  | Mayo Clinic Rochester            | United States of America                 |                                                         |                                                                                            |
| Ognjen                            | Gajic          |                       |                  | Mayo Clinic Rochester            | United States of America                 |                                                         |                                                                                            |
| Vikas                             | Bansal         |                       |                  | Mayo Clinic Rochester            | United States of America                 |                                                         |                                                                                            |
| Aysun                             | Tekin          |                       |                  | Mayo Clinic Rochester            | United States of America                 |                                                         |                                                                                            |
| Amos                              | Lal            |                       |                  | Mayo Clinic Rochester            | United States of America                 |                                                         |                                                                                            |
| John C                            | O'Horo         |                       |                  | Mayo Clinic Rochester            | United States of America                 |                                                         |                                                                                            |
| Neha N                            | Deo            |                       |                  | Mayo Clinic Rochester            | United States of America                 |                                                         |                                                                                            |
| Mayank                            | Sharma         |                       |                  | Mayo Clinic Rochester            | United States of America                 |                                                         |                                                                                            |
| Shahraz                           | Qamar          |                       |                  | Mayo Clinic Rochester            | United States of America                 |                                                         |                                                                                            |

## Supplemental Online Content: Nonauthor Collaborators

\*Indicates required information. Only first name, last name, and suffix will appear in PubMed.

| *First Name and Middle Initial(s) | *Last Name       | *Suffix (eg, Jr, III) | Academic Degrees | Institution                       | Location (city, state/province, country) | Role or Contribution, eg, chair, principal investigator | Group (if more than 1 Group listed in the byline) and/or Subgroup (eg, Steering Committee) |
|-----------------------------------|------------------|-----------------------|------------------|-----------------------------------|------------------------------------------|---------------------------------------------------------|--------------------------------------------------------------------------------------------|
| Romil                             | Singh            |                       |                  | Mayo Clinic Rochester             | United States of America                 |                                                         |                                                                                            |
| Diana J                           | Valencia Morales |                       |                  | Mayo Clinic Rochester             | United States of America                 |                                                         |                                                                                            |
| Abigail T                         | La Nou           |                       |                  | Mayo Clinic Eau Claire            | United States of America                 |                                                         |                                                                                            |
| Marija                            | Bogojevic        |                       |                  | Mayo Clinic Eau Claire            | United States of America                 |                                                         |                                                                                            |
| Simon                             | Zec              |                       |                  | Mayo Clinic Eau Claire            | United States of America                 |                                                         |                                                                                            |
| Devang                            | Sanghavi         |                       |                  | Mayo Clinic Florida               | United States of America                 |                                                         |                                                                                            |
| Pramod                            | Guru             |                       |                  | Mayo Clinic Florida               | United States of America                 |                                                         |                                                                                            |
| Pablo                             | Morno Franco     |                       |                  | Mayo Clinic Florida               | United States of America                 |                                                         |                                                                                            |
| Karthik                           | Ganaphadithan    |                       |                  | Mayo Clinic Florida               | United States of America                 |                                                         |                                                                                            |
| Hollie                            | Saunders         |                       |                  | Mayo Clinic Florida               | United States of America                 |                                                         |                                                                                            |
| Zachary                           | Fleissner        |                       |                  | Mayo Clinic Florida               | United States of America                 |                                                         |                                                                                            |
| Juan                              | Garcia           |                       |                  | Mayo Clinic Florida               | United States of America                 |                                                         |                                                                                            |
| Alejandra                         | Yu Lee Mateus    |                       |                  | Mayo Clinic Florida               | United States of America                 |                                                         |                                                                                            |
| Siva Naga                         | Yarrarapu        |                       |                  | Mayo Clinic Florida               | United States of America                 |                                                         |                                                                                            |
| Nirmaljot                         | Kaur             |                       |                  | Mayo Clinic Florida               | United States of America                 |                                                         |                                                                                            |
| Abhisekh                          | Giri             |                       |                  | Mayo Clinic Florida               | United States of America                 |                                                         |                                                                                            |
| Mohammed                          | Mustafa Hasan    |                       |                  | Mayo Clinic Florida               | United States of America                 |                                                         |                                                                                            |
| Ashrita                           | Donepudi         |                       |                  | Mayo Clinic Florida               | United States of America                 |                                                         |                                                                                            |
| Syed Anjum                        | Khan             |                       |                  | Mayo clinic Mankato               | United States of America                 |                                                         |                                                                                            |
| Nitesh Kumar                      | Jain             |                       |                  | Mayo clinic Mankato               | United States of America                 |                                                         |                                                                                            |
| Thoyaja                           | Koritala         |                       |                  | Mayo clinic Mankato               | United States of America                 |                                                         |                                                                                            |
| Rahul S                           | Nanchal          |                       |                  | Medical college of Wisconsin      | United States of America                 |                                                         |                                                                                            |
| Paul A                            | Bergl            |                       |                  | Medical college of Wisconsin      | United States of America                 |                                                         |                                                                                            |
| Jennifer L                        | Peterson         |                       |                  | Medical college of Wisconsin      | United States of America                 |                                                         |                                                                                            |
| Travis                            | Yamanaka         |                       |                  | Mercy Hospital and Medical Center | United States of America                 |                                                         |                                                                                            |
| Nicholas A                        | Barreras         |                       |                  | Mercy Hospital and Medical Center | United States of America                 |                                                         |                                                                                            |
| Michael                           | Markos           |                       |                  | Mercy Hospital and Medical Center | United States of America                 |                                                         |                                                                                            |
| Anita                             | Fareeduddin      |                       |                  | Mercy Hospital and Medical Center | United States of America                 |                                                         |                                                                                            |
| Rohan                             | Mehta            |                       |                  | Mercy Hospital and Medical Center | United States of America                 |                                                         |                                                                                            |



Supplemental Online Content: Nonauthor Collaborators

\*Indicates required information. Only first name, last name, and suffix will appear in PubMed.

| *First Name and Middle Initial(s) | *Last Name        | *Suffix (eg, Jr, III) | Academic Degrees | Institution                         | Location (city, state/province, country) | Role or Contribution, eg, chair, principal investigator | Group (if more than 1 Group listed in the byline) and/or Subgroup (eg, Steering Committee) |
|-----------------------------------|-------------------|-----------------------|------------------|-------------------------------------|------------------------------------------|---------------------------------------------------------|--------------------------------------------------------------------------------------------|
| Chakradhar                        | Venkata           |                       |                  | Mercy Hospital, Saint Louis         | United States of America                 |                                                         |                                                                                            |
| Miriam                            | Engemann          |                       |                  | Mercy Hospital, Saint Louis         | United States of America                 |                                                         |                                                                                            |
| Annamarie                         | Mantese           |                       |                  | Mercy Hospital, Saint Louis         | United States of America                 |                                                         |                                                                                            |
| Yasir                             | Tarabichi         |                       |                  | MetroHealth Medical Center          | United States of America                 |                                                         |                                                                                            |
| Adam                              | Perzynski         |                       |                  | MetroHealth Medical Center          | United States of America                 |                                                         |                                                                                            |
| Christine                         | Wang              |                       |                  | MetroHealth Medical Center          | United States of America                 |                                                         |                                                                                            |
| Dhatri                            | Kotekal           |                       |                  | MetroHealth Medical Center          | United States of America                 |                                                         |                                                                                            |
| Adriana C                         | Briceno Bierwirth |                       |                  | Midland Memorial Hospital, Texas Te | United States of America                 |                                                         |                                                                                            |
| Gabriela M                        | Orellana          |                       |                  | Midland Memorial Hospital, Texas Te | United States of America                 |                                                         |                                                                                            |
| Gerardo                           | Catalasan         |                       |                  | Midland Memorial Hospital, Texas Te | United States of America                 |                                                         |                                                                                            |
| Shohana                           | Ahmed             |                       |                  | Midland Memorial Hospital, Texas Te | United States of America                 |                                                         |                                                                                            |
| Carlos F                          | Matute            |                       |                  | Midland Memorial Hospital, Texas Te | United States of America                 |                                                         |                                                                                            |
| Ahmad                             | Hamdan            |                       |                  | Midland Memorial Hospital, Texas Te | United States of America                 |                                                         |                                                                                            |
| Ivania                            | Salinas           |                       |                  | Midland Memorial Hospital, Texas Te | United States of America                 |                                                         |                                                                                            |
| Genesis Del                       | Nogal             |                       |                  | Midland Memorial Hospital, Texas Te | United States of America                 |                                                         |                                                                                            |
| Angel                             | Tejada            |                       |                  | Midland Memorial Hospital, Texas Te | United States of America                 |                                                         |                                                                                            |
| Jen-Ting                          | Chen              |                       |                  | Montefiore Medical Center           | United States of America                 |                                                         |                                                                                            |
| Aluko                             | Hope              |                       |                  | Montefiore Medical Center           | United States of America                 |                                                         |                                                                                            |
| Zoe                               | Tsagaris          |                       |                  | Montefiore Medical Center           | United States of America                 |                                                         |                                                                                            |
| Elise                             | Ruen              |                       |                  | Montefiore Medical Center           | United States of America                 |                                                         |                                                                                            |
| Aram                              | Hambardzumyan     |                       |                  | Montefiore Medical Center           | United States of America                 |                                                         |                                                                                            |
| Nasar A                           | Siddiqi           |                       |                  | New Hanover Regional Medical Cente  | United States of America                 |                                                         |                                                                                            |
| Lesly                             | Jurado            |                       |                  | New Hanover Regional Medical Cente  | United States of America                 |                                                         |                                                                                            |
| Lindsey                           | Tincher           |                       |                  | New Hanover Regional Medical Cente  | United States of America                 |                                                         |                                                                                            |
| Carolyn                           | Brown             |                       |                  | New Hanover Regional Medical Cente  | United States of America                 |                                                         |                                                                                            |
| Bhagat S                          | Aulakh            |                       |                  | OSF Saint Francis Medical Center    | United States of America                 |                                                         |                                                                                            |
| Sandeep                           | Tripathi          |                       |                  | OSF Saint Francis Medical Center    | United States of America                 |                                                         |                                                                                            |
| Jennifer A                        | Bandy             |                       |                  | OSF Saint Francis Medical Center    | United States of America                 |                                                         |                                                                                            |
| Lisa                              | Kreps             |                       |                  | OSF Saint Francis Medical Center    | United States of America                 |                                                         |                                                                                            |

## Supplemental Online Content: Nonauthor Collaborators

\*Indicates required information. Only first name, last name, and suffix will appear in PubMed.

| *First Name and Middle Initial(s) | *Last Name       | *Suffix (eg, Jr, III) | Academic Degrees | Institution                         | Location (city, state/province, country) | Role or Contribution, eg, chair, principal investigator | Group (if more than 1 Group listed in the byline) and/or Subgroup (eg, Steering Committee) |
|-----------------------------------|------------------|-----------------------|------------------|-------------------------------------|------------------------------------------|---------------------------------------------------------|--------------------------------------------------------------------------------------------|
| Dwan R                            | Bollinger        |                       |                  | OSF Saint Francis Medical Center    | United States of America                 |                                                         |                                                                                            |
| Roger                             | Scott Stienecker |                       |                  | Parkview Health System              | United States of America                 |                                                         |                                                                                            |
| Andre G                           | Melendez         |                       |                  | Parkview Health System              | United States of America                 |                                                         |                                                                                            |
| Tressa A                          | Brunner          |                       |                  | Parkview Health System              | United States of America                 |                                                         |                                                                                            |
| Sue M                             | Budzon           |                       |                  | Parkview Health System              | United States of America                 |                                                         |                                                                                            |
| Jessica L                         | Heffernan        |                       |                  | Parkview Health System              | United States of America                 |                                                         |                                                                                            |
| Janelle M                         | Souder           |                       |                  | Parkview Health System              | United States of America                 |                                                         |                                                                                            |
| Tracy L                           | Miller           |                       |                  | Parkview Health System              | United States of America                 |                                                         |                                                                                            |
| Andrea G                          | Maisonneuve      |                       |                  | Parkview Health System              | United States of America                 |                                                         |                                                                                            |
| Roberta E                         | Redfern          |                       |                  | ProMedica Toleda Hospital           | United States of America                 |                                                         |                                                                                            |
| Jessica                           | Shoemaker        |                       |                  | ProMedica Toleda Hospital           | United States of America                 |                                                         |                                                                                            |
| Jennifer                          | Micham           |                       |                  | ProMedica Toleda Hospital           | United States of America                 |                                                         |                                                                                            |
| Lynn                              | Kenney           |                       |                  | ProMedica Toleda Hospital           | United States of America                 |                                                         |                                                                                            |
| Gabriela                          | Naimy            |                       |                  | ProMedica Toleda Hospital           | United States of America                 |                                                         |                                                                                            |
| Kerry P                           | J Pulver         |                       |                  | Saint Alphonsus Regional Medical Ce | United States of America                 |                                                         |                                                                                            |
| Jennifer                          | Yehle            |                       |                  | Saint Alphonsus Regional Medical Ce | United States of America                 |                                                         |                                                                                            |
| Alicia                            | Weeks            |                       |                  | Saint Alphonsus Regional Medical Ce | United States of America                 |                                                         |                                                                                            |
| Terra                             | Inman            |                       |                  | Saint Alphonsus Regional Medical Ce | United States of America                 |                                                         |                                                                                            |
| Brain L                           | Delmonaco        |                       |                  | Samaritan Health Services           | United States of America                 |                                                         |                                                                                            |
| Anthony                           | Franklin         |                       |                  | Samaritan Health Services           | United States of America                 |                                                         |                                                                                            |
| Mitchell                          | Heath            |                       |                  | Samaritan Health Services           | United States of America                 |                                                         |                                                                                            |
| Antonia L                         | Vilella          |                       |                  | Sarasota Memorial Hospital          | United States of America                 |                                                         |                                                                                            |
| Sara B                            | Kutner           |                       |                  | Sarasota Memorial Hospital          | United States of America                 |                                                         |                                                                                            |
| Kacie                             | Clark            |                       |                  | Sarasota Memorial Hospital          | United States of America                 |                                                         |                                                                                            |
| Danielle                          | Moore            |                       |                  | Sarasota Memorial Hospital          | United States of America                 |                                                         |                                                                                            |
| Harry L                           | Anderson         |                       |                  | St. Joseph Mercy Ann Arbor          | United States of America                 |                                                         |                                                                                            |
| Dixy                              | Rajkumar         |                       |                  | St. Joseph Mercy Ann Arbor          | United States of America                 |                                                         |                                                                                            |
| Ali                               | Abunayla         |                       |                  | St. Joseph Mercy Ann Arbor          | United States of America                 |                                                         |                                                                                            |
| Jerrilyn                          | Heiter           |                       |                  | St. Joseph Mercy Ann Arbor          | United States of America                 |                                                         |                                                                                            |
| Howard A                          | Zaren            |                       |                  | St. Joseph's Candler Health System  | United States of America                 |                                                         |                                                                                            |

## Supplemental Online Content: Nonauthor Collaborators

\*Indicates required information. Only first name, last name, and suffix will appear in PubMed.

| *First Name and Middle Initial(s) | *Last Name  | *Suffix (eg, Jr, III) | Academic Degrees | Institution                        | Location (city, state/province, country) | Role or Contribution, eg, chair, principal investigator | Group (if more than 1 Group listed in the byline) and/or Subgroup (eg, Steering Committee) |
|-----------------------------------|-------------|-----------------------|------------------|------------------------------------|------------------------------------------|---------------------------------------------------------|--------------------------------------------------------------------------------------------|
| Stephanie J                       | Smith       |                       |                  | St. Joseph's Candler Health System | United States of America                 |                                                         |                                                                                            |
| Grant C                           | Lewis       |                       |                  | St. Joseph's Candler Health System | United States of America                 |                                                         |                                                                                            |
| Lauren                            | Seames      |                       |                  | St. Joseph's Candler Health System | United States of America                 |                                                         |                                                                                            |
| Cheryl                            | Farlow      |                       |                  | St. Joseph's Candler Health System | United States of America                 |                                                         |                                                                                            |
| Judy                              | Miller      |                       |                  | St. Joseph's Candler Health System | United States of America                 |                                                         |                                                                                            |
| Gloria                            | Broadstreet |                       |                  | St. Joseph's Candler Health System | United States of America                 |                                                         |                                                                                            |
| Anthony                           | Martinez    |                       |                  | St. Agnes Hospital                 | United States of America                 |                                                         |                                                                                            |
| Micheal                           | Allison     |                       |                  | St. Agnes Hospital                 | United States of America                 |                                                         |                                                                                            |
| Aniket                            | Mittal      |                       |                  | St. Agnes Hospital                 | United States of America                 |                                                         |                                                                                            |
| Rafael                            | Ruiz        |                       |                  | St. Agnes Hospital                 | United States of America                 |                                                         |                                                                                            |
| Aleta                             | Skaanland   |                       |                  | St. Agnes Hospital                 | United States of America                 |                                                         |                                                                                            |
| Robert                            | Ross        |                       |                  | St. Agnes Hospital                 | United States of America                 |                                                         |                                                                                            |
| Umang                             | Patel       |                       |                  | St. Mary Medical Center            | United States of America                 |                                                         |                                                                                            |
| Jordesha                          | Hodge       |                       |                  | St. Mary Medical Center            | United States of America                 |                                                         |                                                                                            |
| Krunal Kumar                      | Patel       |                       |                  | St. Mary Medical Center            | United States of America                 |                                                         |                                                                                            |
| Shivani                           | Dalal       |                       |                  | St. Mary Medical Center            | United States of America                 |                                                         |                                                                                            |
| Himanshu                          | Kavani      |                       |                  | St. Mary Medical Center            | United States of America                 |                                                         |                                                                                            |
| Sam                               | Joseph      |                       |                  | St. Mary Medical Center            | United States of America                 |                                                         |                                                                                            |
| Michael A                         | Bernstein   |                       |                  | Stamdford Health                   | United States of America                 |                                                         |                                                                                            |
| Ian K                             | Goff        |                       |                  | Stamdford Health                   | United States of America                 |                                                         |                                                                                            |
| Matthew                           | Naftilan    |                       |                  | Stamdford Health                   | United States of America                 |                                                         |                                                                                            |
| Amal                              | Mathew      |                       |                  | Stamdford Health                   | United States of America                 |                                                         |                                                                                            |
| Debora                            | Williams    |                       |                  | Stamdford Health                   | United States of America                 |                                                         |                                                                                            |
| Sue                               | Murdock     |                       |                  | Stamdford Health                   | United States of America                 |                                                         |                                                                                            |
| Maryanne                          | Ducey       |                       |                  | Stamdford Health                   | United States of America                 |                                                         |                                                                                            |
| Kerianne                          | Nelson      |                       |                  | Stamdford Health                   | United States of America                 |                                                         |                                                                                            |
| Jason                             | Block       |                       |                  | Standford Hospital and Clinics     | United States of America                 |                                                         |                                                                                            |
| James                             | Mitchel     |                       |                  | Standford Hospital and Clinics     | United States of America                 |                                                         |                                                                                            |
| Connor G                          | O'Brien     |                       |                  | Standford Hospital and Clinics     | United States of America                 |                                                         |                                                                                            |
| Sylvan                            | Cox         |                       |                  | Standford Hospital and Clinics     | United States of America                 |                                                         |                                                                                            |
| Ioana                             | Amzuta      |                       |                  | SUNY Update Medical Univeristy     | United States of America                 |                                                         |                                                                                            |

Supplemental Online Content: Nonauthor Collaborators

\*Indicates required information. Only first name, last name, and suffix will appear in PubMed.

| *First Name and Middle Initial(s) | *Last Name  | *Suffix (eg, Jr, III) | Academic Degrees | Institution                           | Location (city, state/province, country) | Role or Contribution, eg, chair, principal investigator | Group (if more than 1 Group listed in the byline) and/or Subgroup (eg, Steering Committee) |
|-----------------------------------|-------------|-----------------------|------------------|---------------------------------------|------------------------------------------|---------------------------------------------------------|--------------------------------------------------------------------------------------------|
| Amish                             | Shah        |                       |                  | SUNY Update Medical Univeristy        | United States of America                 |                                                         |                                                                                            |
| Ritu                              | Modi        |                       |                  | SUNY Update Medical Univeristy        | United States of America                 |                                                         |                                                                                            |
| Hassan                            | Al-Khalisy  |                       |                  | SUNY Update Medical Univeristy        | United States of America                 |                                                         |                                                                                            |
| Pradeep                           | Masuta      |                       |                  | SUNY Update Medical Univeristy        | United States of America                 |                                                         |                                                                                            |
| Melissa                           | Schafer     |                       |                  | SUNY Update Medical Univeristy        | United States of America                 |                                                         |                                                                                            |
| Angela                            | Wratney     |                       |                  | SUNY Update Medical Univeristy        | United States of America                 |                                                         |                                                                                            |
| Kristina L                        | Carter      |                       |                  | Texas Health Resources                | United States of America                 |                                                         |                                                                                            |
| Michael                           | Olmos       |                       |                  | Texas Health Resources                | United States of America                 |                                                         |                                                                                            |
| Brittany M                        | Parker      |                       |                  | Texas Health Resources                | United States of America                 |                                                         |                                                                                            |
| Julio                             | Quintanilla |                       |                  | Texas Health Resources                | United States of America                 |                                                         |                                                                                            |
| Tara A                            | Craig       |                       |                  | Texas Health Resources                | United States of America                 |                                                         |                                                                                            |
| Brendon J                         | Clough      |                       |                  | Texas Health Resources                | United States of America                 |                                                         |                                                                                            |
| Jeffrey T                         | Jameson     |                       |                  | Texas Health Resources                | United States of America                 |                                                         |                                                                                            |
| Neha                              | Gupta       |                       |                  | The Children's Hospital at OU Medicin | United States of America                 |                                                         |                                                                                            |
| Tacy L                            | Jones       |                       |                  | The Children's Hospital at OU Medicin | United States of America                 |                                                         |                                                                                            |
| Shonda C                          | Ayers       |                       |                  | The Children's Hospital at OU Medicin | United States of America                 |                                                         |                                                                                            |
| Amy B                             | Harrell     |                       |                  | The Children's Hospital at OU Medicin | United States of America                 |                                                         |                                                                                            |
| Brent R                           | Brown       |                       |                  | The Children's Hospital at OU Medicin | United States of America                 |                                                         |                                                                                            |
| Caleb                             | Darby       |                       |                  | The University of Tennessee Medical   | United States of America                 |                                                         |                                                                                            |
| Kristy                            | Page        |                       |                  | The University of Tennessee Medical   | United States of America                 |                                                         |                                                                                            |
| Amanda                            | Brown       |                       |                  | The University of Tennessee Medical   | United States of America                 |                                                         |                                                                                            |
| Jessie                            | McAbee      |                       |                  | The University of Tennessee Medical   | United States of America                 |                                                         |                                                                                            |
| Katherine A                       | Belden      |                       |                  | Thomas Jefferson University Hospital  | United States of America                 |                                                         |                                                                                            |
| Michael                           | Baram       |                       |                  | Thomas Jefferson University Hospital  | United States of America                 |                                                         |                                                                                            |
| Devin M                           | Weber       |                       |                  | Thomas Jefferson University Hospital  | United States of America                 |                                                         |                                                                                            |
| Rosalie                           | DePaola     |                       |                  | Thomas Jefferson University Hospital  | United States of America                 |                                                         |                                                                                            |
| Yuwei                             | Xia         |                       |                  | Thomas Jefferson University Hospital  | United States of America                 |                                                         |                                                                                            |
| Hudson                            | Carter      |                       |                  | Thomas Jefferson University Hospital  | United States of America                 |                                                         |                                                                                            |
| Aaron                             | Tolley      |                       |                  | Thomas Jefferson University Hospital  | United States of America                 |                                                         |                                                                                            |
| Mary                              | Ferranti    |                       |                  | Thomas Jefferson University Hospital  | United States of America                 |                                                         |                                                                                            |
| Mark                              | Steele      |                       |                  | Truman Medical Centers                | United States of America                 |                                                         |                                                                                            |

Supplemental Online Content: Nonauthor Collaborators

\*Indicates required information. Only first name, last name, and suffix will appear in PubMed.

| *First Name and Middle Initial(s) | *Last Name  | *Suffix (eg, Jr, III) | Academic Degrees | Institution                             | Location (city, state/province, country) | Role or Contribution, eg, chair, principal investigator | Group (if more than 1 Group listed in the byline) and/or Subgroup (eg, Steering Committee) |
|-----------------------------------|-------------|-----------------------|------------------|-----------------------------------------|------------------------------------------|---------------------------------------------------------|--------------------------------------------------------------------------------------------|
| Laurie                            | Kemble      |                       |                  | Truman Medical Centers                  | United States of America                 |                                                         |                                                                                            |
| Joshua                            | Sethi       |                       |                  | Tulane University Medical Center and    | United States of America                 |                                                         |                                                                                            |
| Chung                             | Cheng Han   |                       |                  | Tulane University Medical Center and    | United States of America                 |                                                         |                                                                                            |
| Jaclyn                            | Pagliari    |                       |                  | Tulane University Medical Center and    | United States of America                 |                                                         |                                                                                            |
| Abdurrahman                       | Husian      |                       |                  | UC San Diego Medical Center             | United States of America                 |                                                         |                                                                                            |
| Atul                              | Malhotra    |                       |                  | UC San Diego Medical Center             | United States of America                 |                                                         |                                                                                            |
| Qais                              | Zawaydeh    |                       |                  | UC San Diego Medical Center             | United States of America                 |                                                         |                                                                                            |
| Benjamin J                        | Sines       |                       |                  | UNC Medical Center                      | United States of America                 |                                                         |                                                                                            |
| Thomas J                          | Bice        |                       |                  | UNC Medical Center                      | United States of America                 |                                                         |                                                                                            |
| Dragana                           | Markotic    |                       |                  | University Clinical Hospital, Mostar, B | United States of America                 |                                                         |                                                                                            |
| Ivana                             | Bosnjak     |                       |                  | University Clinical Hospital, Mostar, B | United States of America                 |                                                         |                                                                                            |
| Emily A                           | Vail        |                       |                  | University Hospital San Antonio         | United States of America                 |                                                         |                                                                                            |
| Susannah                          | Nicholson   |                       |                  | University Hospital San Antonio         | United States of America                 |                                                         |                                                                                            |
| Rachelle B                        | Jonas       |                       |                  | University Hospital San Antonio         | United States of America                 |                                                         |                                                                                            |
| AnnaRose E                        | Dement      |                       |                  | University Hospital San Antonio         | United States of America                 |                                                         |                                                                                            |
| William                           | Tang        |                       |                  | University Hospital San Antonio         | United States of America                 |                                                         |                                                                                            |
| Mark                              | DeRose      |                       |                  | University Hospital San Antonio         | United States of America                 |                                                         |                                                                                            |
| Robert E                          | Villarreal  |                       |                  | University Hospital San Antonio         | United States of America                 |                                                         |                                                                                            |
| Rajany V                          | Dy          |                       |                  | University Medical Center of Souther    | United States of America                 |                                                         |                                                                                            |
| Alfredo                           | Lardino     |                       |                  | University Medical Center of Souther    | United States of America                 |                                                         |                                                                                            |
| Jill                              | Sharma      |                       |                  | University Medical Center of Souther    | United States of America                 |                                                         |                                                                                            |
| Richard                           | Czieki      |                       |                  | University Medical Center of Souther    | United States of America                 |                                                         |                                                                                            |
| Julia                             | Christopher |                       |                  | University Medical Center of Souther    | United States of America                 |                                                         |                                                                                            |
| Ryan                              | Lacey       |                       |                  | University Medical Center of Souther    | United States of America                 |                                                         |                                                                                            |
| Marwan                            | Mashina     |                       |                  | University Medical Center of Souther    | United States of America                 |                                                         |                                                                                            |
| Kushal                            | Patel       |                       |                  | University Medical Center of Souther    | United States of America                 |                                                         |                                                                                            |
| Dina                              | Gomaa       |                       |                  | University of Cincinnati                | United States of America                 |                                                         |                                                                                            |
| Micahel                           | Goodman     |                       |                  | University of Cincinnati                | United States of America                 |                                                         |                                                                                            |
| Devin                             | Wakefield   |                       |                  | University of Cincinnati                | United States of America                 |                                                         |                                                                                            |
| Anthony                           | Spuzzillo   |                       |                  | University of Cincinnati                | United States of America                 |                                                         |                                                                                            |
| John O                            | Shinn II    |                       |                  | University of Cincinnati                | United States of America                 |                                                         |                                                                                            |

Supplemental Online Content: Nonauthor Collaborators

\*Indicates required information. Only first name, last name, and suffix will appear in PubMed.

| *First Name and Middle Initial(s) | *Last Name        | *Suffix (eg, Jr, III) | Academic Degrees | Institution                            | Location (city, state/province, country) | Role or Contribution, eg, chair, principal investigator | Group (if more than 1 Group listed in the byline) and/or Subgroup (eg, Steering Committee) |
|-----------------------------------|-------------------|-----------------------|------------------|----------------------------------------|------------------------------------------|---------------------------------------------------------|--------------------------------------------------------------------------------------------|
| Azra                              | Bihorac           |                       |                  | University of Florida Health Shands H  | United States of America                 |                                                         |                                                                                            |
| Tezcan                            | Ozrazgat Baslanti |                       |                  | University of Florida Health Shands H  | United States of America                 |                                                         |                                                                                            |
| George                            | Omalay            |                       |                  | University of Florida Health Shands H  | United States of America                 |                                                         |                                                                                            |
| Haleh                             | Hashemighouchani  |                       |                  | University of Florida Health Shands H  | United States of America                 |                                                         |                                                                                            |
| Julie S                           | Cupka             |                       |                  | University of Florida Health Shands H  | United States of America                 |                                                         |                                                                                            |
| Matthew M                         | Ruppert           |                       |                  | University of Florida Health Shands H  | United States of America                 |                                                         |                                                                                            |
| Patrick W                         | McGonagill        |                       |                  | University of Iowa Carver College of M | United States of America                 |                                                         |                                                                                            |
| Colette                           | Galet             |                       |                  | University of Iowa Carver College of M | United States of America                 |                                                         |                                                                                            |
| Janice                            | Hubbard           |                       |                  | University of Iowa Carver College of M | United States of America                 |                                                         |                                                                                            |
| David                             | Wang              |                       |                  | University of Iowa Carver College of M | United States of America                 |                                                         |                                                                                            |
| Lauren                            | Allan             |                       |                  | University of Iowa Carver College of M | United States of America                 |                                                         |                                                                                            |
| Aditya                            | Badheka           |                       |                  | University of Iowa Carver College of M | United States of America                 |                                                         |                                                                                            |
| Madhuradhar                       | Chegondi          |                       |                  | University of Iowa Carver College of M | United States of America                 |                                                         |                                                                                            |
| Usman                             | Nazir             |                       |                  | University of Kansas Medical Center    | United States of America                 |                                                         |                                                                                            |
| Garrett                           | Rampon            |                       |                  | University of Kansas Medical Center    | United States of America                 |                                                         |                                                                                            |
| Jake                              | Riggle            |                       |                  | University of Kansas Medical Center    | United States of America                 |                                                         |                                                                                            |
| Nathan                            | Dismag            |                       |                  | University of Kansas Medical Center    | United States of America                 |                                                         |                                                                                            |
| Ozan                              | Akca              |                       |                  | University of Louisville Hospital      | United States of America                 |                                                         |                                                                                            |
| Rainer                            | Lenhardt          |                       |                  | University of Louisville Hospital      | United States of America                 |                                                         |                                                                                            |
| Rodrigo S                         | Cavallazzi        |                       |                  | University of Louisville Hospital      | United States of America                 |                                                         |                                                                                            |
| Ann                               | Jerde             |                       |                  | University of Louisville Hospital      | United States of America                 |                                                         |                                                                                            |
| Alexa                             | Black             |                       |                  | University of Louisville Hospital      | United States of America                 |                                                         |                                                                                            |
| Allison                           | Polidori          |                       |                  | University of Louisville Hospital      | United States of America                 |                                                         |                                                                                            |
| Haily                             | Griffey           |                       |                  | University of Louisville Hospital      | United States of America                 |                                                         |                                                                                            |
| Justin                            | Winkler           |                       |                  | University of Louisville Hospital      | United States of America                 |                                                         |                                                                                            |
| Thomas                            | Brenzel           |                       |                  | University of Louisville Hospital      | United States of America                 |                                                         |                                                                                            |
| Rodger A                          | Alvarez           |                       |                  | Univeristy of Maiami Miller School of  | United States of America                 |                                                         |                                                                                            |
| Amarily                           | Alarocon-Calderon |                       |                  | Univeristy of Maiami Miller School of  | United States of America                 |                                                         |                                                                                            |

## Supplemental Online Content: Nonauthor Collaborators

\*Indicates required information. Only first name, last name, and suffix will appear in PubMed.

| *First Name and Middle Initial(s) | *Last Name | *Suffix (eg, Jr, III) | Academic Degrees | Institution                           | Location (city, state/province, country) | Role or Contribution, eg, chair, principal investigator | Group (if more than 1 Group listed in the byline) and/or Subgroup (eg, Steering Committee) |
|-----------------------------------|------------|-----------------------|------------------|---------------------------------------|------------------------------------------|---------------------------------------------------------|--------------------------------------------------------------------------------------------|
| Marie Anne                        | Sosa       |                       |                  | Univeristy of Maiami Miller School of | United States of America                 |                                                         |                                                                                            |
| Sunita K                          | Mahabir    |                       |                  | Univeristy of Maiami Miller School of | United States of America                 |                                                         |                                                                                            |
| Mausam J                          | Patel      |                       |                  | Univeristy of Maiami Miller School of | United States of America                 |                                                         |                                                                                            |
| Pauline                           | Parker     |                       |                  | Univeristy of Michigan Health System  | United States of America                 |                                                         |                                                                                            |
| Andre                             | Admon      |                       |                  | Univeristy of Michigan Health System  | United States of America                 |                                                         |                                                                                            |
| Sinan                             | Hanna      |                       |                  | Univeristy of Michigan Health System  | United States of America                 |                                                         |                                                                                            |
| Rishi                             | Chanderraj |                       |                  | Univeristy of Michigan Health System  | United States of America                 |                                                         |                                                                                            |
| Maria                             | Pliakas    |                       |                  | Univeristy of Michigan Health System  | United States of America                 |                                                         |                                                                                            |
| Ann                               | Wolski     |                       |                  | Univeristy of Michigan Health System  | United States of America                 |                                                         |                                                                                            |
| Jennifer                          | Cirino     |                       |                  | Univeristy of Michigan Health System  | United States of America                 |                                                         |                                                                                            |
| Dima                              | Dandachi   |                       |                  | University of Missouri                | United States of America                 |                                                         |                                                                                            |
| Hariharan                         | Regunath   |                       |                  | University of Missouri                | United States of America                 |                                                         |                                                                                            |
| Maraya N                          | Camazine   |                       |                  | University of Missouri                | United States of America                 |                                                         |                                                                                            |
| Grant E                           | Geiger     |                       |                  | University of Missouri                | United States of America                 |                                                         |                                                                                            |
| Abdoulie O                        | Njai       |                       |                  | University of Missouri                | United States of America                 |                                                         |                                                                                            |
| Baraa M                           | Saad       |                       |                  | University of Missouri                | United States of America                 |                                                         |                                                                                            |
| Faraaz Ali                        | Shah       |                       |                  | University of Pittsburgh              | United States of America                 |                                                         |                                                                                            |
| Byron                             | Chuan      |                       |                  | University of Pittsburgh              | United States of America                 |                                                         |                                                                                            |
| Sagar L                           | Rawal      |                       |                  | University of Pittsburgh              | United States of America                 |                                                         |                                                                                            |
| Manal                             | Piracha    |                       |                  | University of Pittsburgh              | United States of America                 |                                                         |                                                                                            |
| Joseph E                          | Tonna      |                       |                  | University of Utah Health             | United States of America                 |                                                         |                                                                                            |
| Nicholas M                        | Levin      |                       |                  | University of Utah Health             | United States of America                 |                                                         |                                                                                            |
| Kayte                             | Suslavich  |                       |                  | University of Utah Health             | United States of America                 |                                                         |                                                                                            |
| Rachel                            | Tsolinas   |                       |                  | University of Utah Health             | United States of America                 |                                                         |                                                                                            |
| Zachary T                         | Fica       |                       |                  | University of Utah Health             | United States of America                 |                                                         |                                                                                            |
| Chloe R                           | Skidmore   |                       |                  | University of Utah Health             | United States of America                 |                                                         |                                                                                            |
| Renee D                           | Stapleton  |                       |                  | University of Vermont Larner College  | United States of America                 |                                                         |                                                                                            |
| Anne E                            | Dixon      |                       |                  | University of Vermont Larner College  | United States of America                 |                                                         |                                                                                            |
| Olivia                            | Johnson    |                       |                  | University of Vermont Larner College  | United States of America                 |                                                         |                                                                                            |
| Sara S                            | Ardren     |                       |                  | University of Vermont Larner College  | United States of America                 |                                                         |                                                                                            |
| Stephanie                         | Burns      |                       |                  | University of Vermont Larner College  | United States of America                 |                                                         |                                                                                            |

Supplemental Online Content: Nonauthor Collaborators

\*Indicates required information. Only first name, last name, and suffix will appear in PubMed.

| *First Name and Middle Initial(s) | *Last Name     | *Suffix (eg, Jr, III) | Academic Degrees | Institution                          | Location (city, state/province, country) | Role or Contribution, eg, chair, principal investigator | Group (if more than 1 Group listed in the byline) and/or Subgroup (eg, Steering Committee) |
|-----------------------------------|----------------|-----------------------|------------------|--------------------------------------|------------------------------------------|---------------------------------------------------------|--------------------------------------------------------------------------------------------|
| Anna                              | Raymond        |                       |                  | University of Vermont Larner College | United States of America                 |                                                         |                                                                                            |
| Erika                             | Gonyaw         |                       |                  | University of Vermont Larner College | United States of America                 |                                                         |                                                                                            |
| Kevin                             | Hodgdon        |                       |                  | University of Vermont Larner College | United States of America                 |                                                         |                                                                                            |
| Chole                             | Houseger       |                       |                  | University of Vermont Larner College | United States of America                 |                                                         |                                                                                            |
| Benjamin                          | Lin            |                       |                  | University of Vermont Larner College | United States of America                 |                                                         |                                                                                            |
| Karen                             | McQuesten      |                       |                  | University of Vermont Larner College | United States of America                 |                                                         |                                                                                            |
| Heidi                             | Pecott- Grimm  |                       |                  | University of Vermont Larner College | United States of America                 |                                                         |                                                                                            |
| Julie                             | Sweet          |                       |                  | University of Vermont Larner College | United States of America                 |                                                         |                                                                                            |
| Sebastian                         | Ventrone       |                       |                  | University of Vermont Larner College | United States of America                 |                                                         |                                                                                            |
| Nita                              | Khandelwal     |                       |                  | University of Washington             | United States of America                 |                                                         |                                                                                            |
| T Eoin                            | West           |                       |                  | University of Washington             | United States of America                 |                                                         |                                                                                            |
| Ellen S                           | Caldwell       |                       |                  | University of Washington             | United States of America                 |                                                         |                                                                                            |
| Lara                              | Lovelace-Macon |                       |                  | University of Washington             | United States of America                 |                                                         |                                                                                            |
| Navya                             | Garimella      |                       |                  | University of Washington             | United States of America                 |                                                         |                                                                                            |
| Denisse B                         | Dow            |                       |                  | University of Washington             | United States of America                 |                                                         |                                                                                            |
| Murtaza                           | Akhter         |                       |                  | Valleywise Health (formerly Maricopa | United States of America                 |                                                         |                                                                                            |
| Rania Abdul                       | Rahman         |                       |                  | Valleywise Health (formerly Maricopa | United States of America                 |                                                         |                                                                                            |
| Mary                              | Mulrow         |                       |                  | Valleywise Health (formerly Maricopa | United States of America                 |                                                         |                                                                                            |
| Erin M                            | Wilfong        |                       |                  | Vanderbilt University Medical Center | United States of America                 |                                                         |                                                                                            |
| Kelsi                             | Vela           |                       |                  | Vanderbilt University Medical Center | United States of America                 |                                                         |                                                                                            |
| Ashish K                          | Khanna         |                       |                  | Wake Forest University School of Me  | United States of America                 |                                                         |                                                                                            |
| Lynne                             | Harris         |                       |                  | Wake Forest University School of Me  | United States of America                 |                                                         |                                                                                            |
| Bruce                             | Cusson         |                       |                  | Wake Forest University School of Me  | United States of America                 |                                                         |                                                                                            |
| Jacob                             | Fowler         |                       |                  | Wake Forest University School of Me  | United States of America                 |                                                         |                                                                                            |
| David                             | Vaneenaam      |                       |                  | Wake Forest University School of Me  | United States of America                 |                                                         |                                                                                            |
| Glen                              | Mckinney       |                       |                  | Wake Forest University School of Me  | United States of America                 |                                                         |                                                                                            |
| Imoh                              | Udoh           |                       |                  | Wake Forest University School of Me  | United States of America                 |                                                         |                                                                                            |
| Kathleen                          | Johnson        |                       |                  | Wake Forest University School of Me  | United States of America                 |                                                         |                                                                                            |
| Patrick G                         | Lyons          |                       |                  | Washington University School of Med  | United States of America                 |                                                         |                                                                                            |
| Andrew P                          | Michelson      |                       |                  | Washington University School of Med  | United States of America                 |                                                         |                                                                                            |



Supplemental Online Content: Nonauthor Collaborators

\*Indicates required information. Only first name, last name, and suffix will appear in PubMed.

| *First Name and Middle Initial(s) | *Last Name | *Suffix (eg, Jr, III) | Academic Degrees | Institution                         | Location (city, state/province, country) | Role or Contribution, eg, chair, principal investigator | Group (if more than 1 Group listed in the byline) and/or Subgroup (eg, Steering Committee) |
|-----------------------------------|------------|-----------------------|------------------|-------------------------------------|------------------------------------------|---------------------------------------------------------|--------------------------------------------------------------------------------------------|
| Sara S                            | Haulf      |                       |                  | Washington University School of Med | United States of America                 |                                                         |                                                                                            |
| Lauren M                          | Lynch      |                       |                  | Washington University School of Med | United States of America                 |                                                         |                                                                                            |
| Nguyet M                          | Nguyen     |                       |                  | Washington University School of Med | United States of America                 |                                                         |                                                                                            |
| Aaron                             | Steinbery  |                       |                  | Washington University School of Med | United States of America                 |                                                         |                                                                                            |
| Nicholas                          | Braus      |                       |                  | William S. Middleton Memorial VA H  | United States of America                 |                                                         |                                                                                            |
| Vishwanath                        | Pattan     |                       |                  | Wyoming Medical Center              | United States of America                 |                                                         |                                                                                            |
| Jessica                           | Papke      |                       |                  | Wyoming Medical Center              | United States of America                 |                                                         |                                                                                            |
| Ismail                            | Jimada     |                       |                  | Wyoming Medical Center              | United States of America                 |                                                         |                                                                                            |
| Nida                              | Mhid       |                       |                  | Wyoming Medical Center              | United States of America                 |                                                         |                                                                                            |
| Samuel                            | Chakola    |                       |                  | Wyoming Medical Center              | United States of America                 |                                                         |                                                                                            |
| Kevin                             | Sheth      |                       |                  | Yale New Haven Health New Haven     | United States of America                 |                                                         |                                                                                            |
| Abdalla                           | Ammar      |                       |                  | Yale New Haven Health New Haven     | United States of America                 |                                                         |                                                                                            |
| Mahmoud                           | Ammar      |                       |                  | Yale New Haven Health New Haven     | United States of America                 |                                                         |                                                                                            |
| Victor Torres                     | Lopez      |                       |                  | Yale New Haven Health New Haven     | United States of America                 |                                                         |                                                                                            |
| Charles                           | Dela Cruz  |                       |                  | Yale New Haven Health New Haven     | United States of America                 |                                                         |                                                                                            |
| Akhil                             | Khosla     |                       |                  | Yale New Haven Health New Haven     | United States of America                 |                                                         |                                                                                            |
| Samir                             | Gautam     |                       |                  | Yale New Haven Health New Haven     | United States of America                 |                                                         |                                                                                            |
